# Supplementary material for: Microtubule Dynamics Deregulation Induces Apoptosis in Human Urothelial Bladder Cancer Cells via a p53-independent Pathway
Source: Preprints.org preprint supplement (doi:10.20944/preprints202306.1476.v1), 2023-06-21
Supplement: Supplementary file 1 [file supplementary]

Article - Supplementary Images

Microtubule Dynamics Deregulation Induces Apoptosis in Human Urothelial Bladder Cancer Cells via a p53-independent Pathway

Yiannis Drosos1*, Eumorphia G. Konstantakou2, Aggeliki-Stefania Bassogianni1, Konstantinos-Stylianos Nikolakopoulos1, Dimitra G. Koumoundourou1, Sophia P. Markaki1, Ourania E. Tsitsilonis3, Gerassimos E. Voutsinas4, Dimitrios Valakos5, Ema Anastasiadou5, Dimitris Thanos5 Athanassios D. Velentzas1 and Dimitrios J. Stravopodis1*

1 Section of Cell Biology and Biophysics, Department of Biology, School of Science, National and Kapodistrian University of Athens (NKUA), 15701 Athens, Greece; [sbasogianni@gmail.com](mailto:sbasogianni@gmail.com) (A-S.B.); [ksnikolakop@biol.uoa.gr](mailto:ksnikolakop@biol.uoa.gr) (K-S.N.); [dimikoum@biol.uoa.gr](mailto:dimikoum@biol.uoa.gr) (D.G.K.); [smarkak@biol.uoa.gr](mailto:smarkak@biol.uoa.gr) (S.P.M.); [tveletz@biol.uoa.gr](mailto:tveletz@biol.uoa.gr) (A.D.V.)

2 Massachusetts General Hospital Cancer Center (MGHCC), Harvard Medical School, Charlestown, Boston, Massachusetts (MA) 02114, USA; [ekonstantakou@mgh.harvard.edu](mailto:ekonstantakou@mgh.harvard.edu)

3 Section of Animal and Human Physiology, Department of Biology, School of Science, National and Kapodistrian University of Athens (NKUA), 15701 Athens, Greece; [rtsitsil@biol.uoa.gr](mailto:rtsitsil@biol.uoa.gr)

4 Laboratory of Molecular Carcinogenesis and Rare Disease Genetics, Institute of Biosciences and Applications (IBA), National Center for Scientific Research (NCSR) “Demokritos”, 15310 Athens, Greece; [mvoutsin@bio.demokritos.gr](mailto:mvoutsin@bio.demokritos.gr)

5 Center of Basic Research, Biomedical Research Foundation of the Academy of Athens (BRFAA), 11527 Athens, Greece; [dvalakos@bioacademy.gr](mailto:dvalakos@bioacademy.gr) (D.V.); [anastasiadou@bioacademy.gr](mailto:anastasiadou@bioacademy.gr) (E.A.); [thanos@bioacademy.gr](mailto:thanos@bioacademy.gr) (D.T.)

***** Correspondence: [ydrosos@biol.uoa.gr](mailto:ydrosos@biol.uoa.gr) (Y.D.); [dstravop@biol.uoa.gr](mailto:dstravop@biol.uoa.gr) (D.J.S.); Tel.: +30-210-727-4105 (D.J.S.)

Supplementary Images


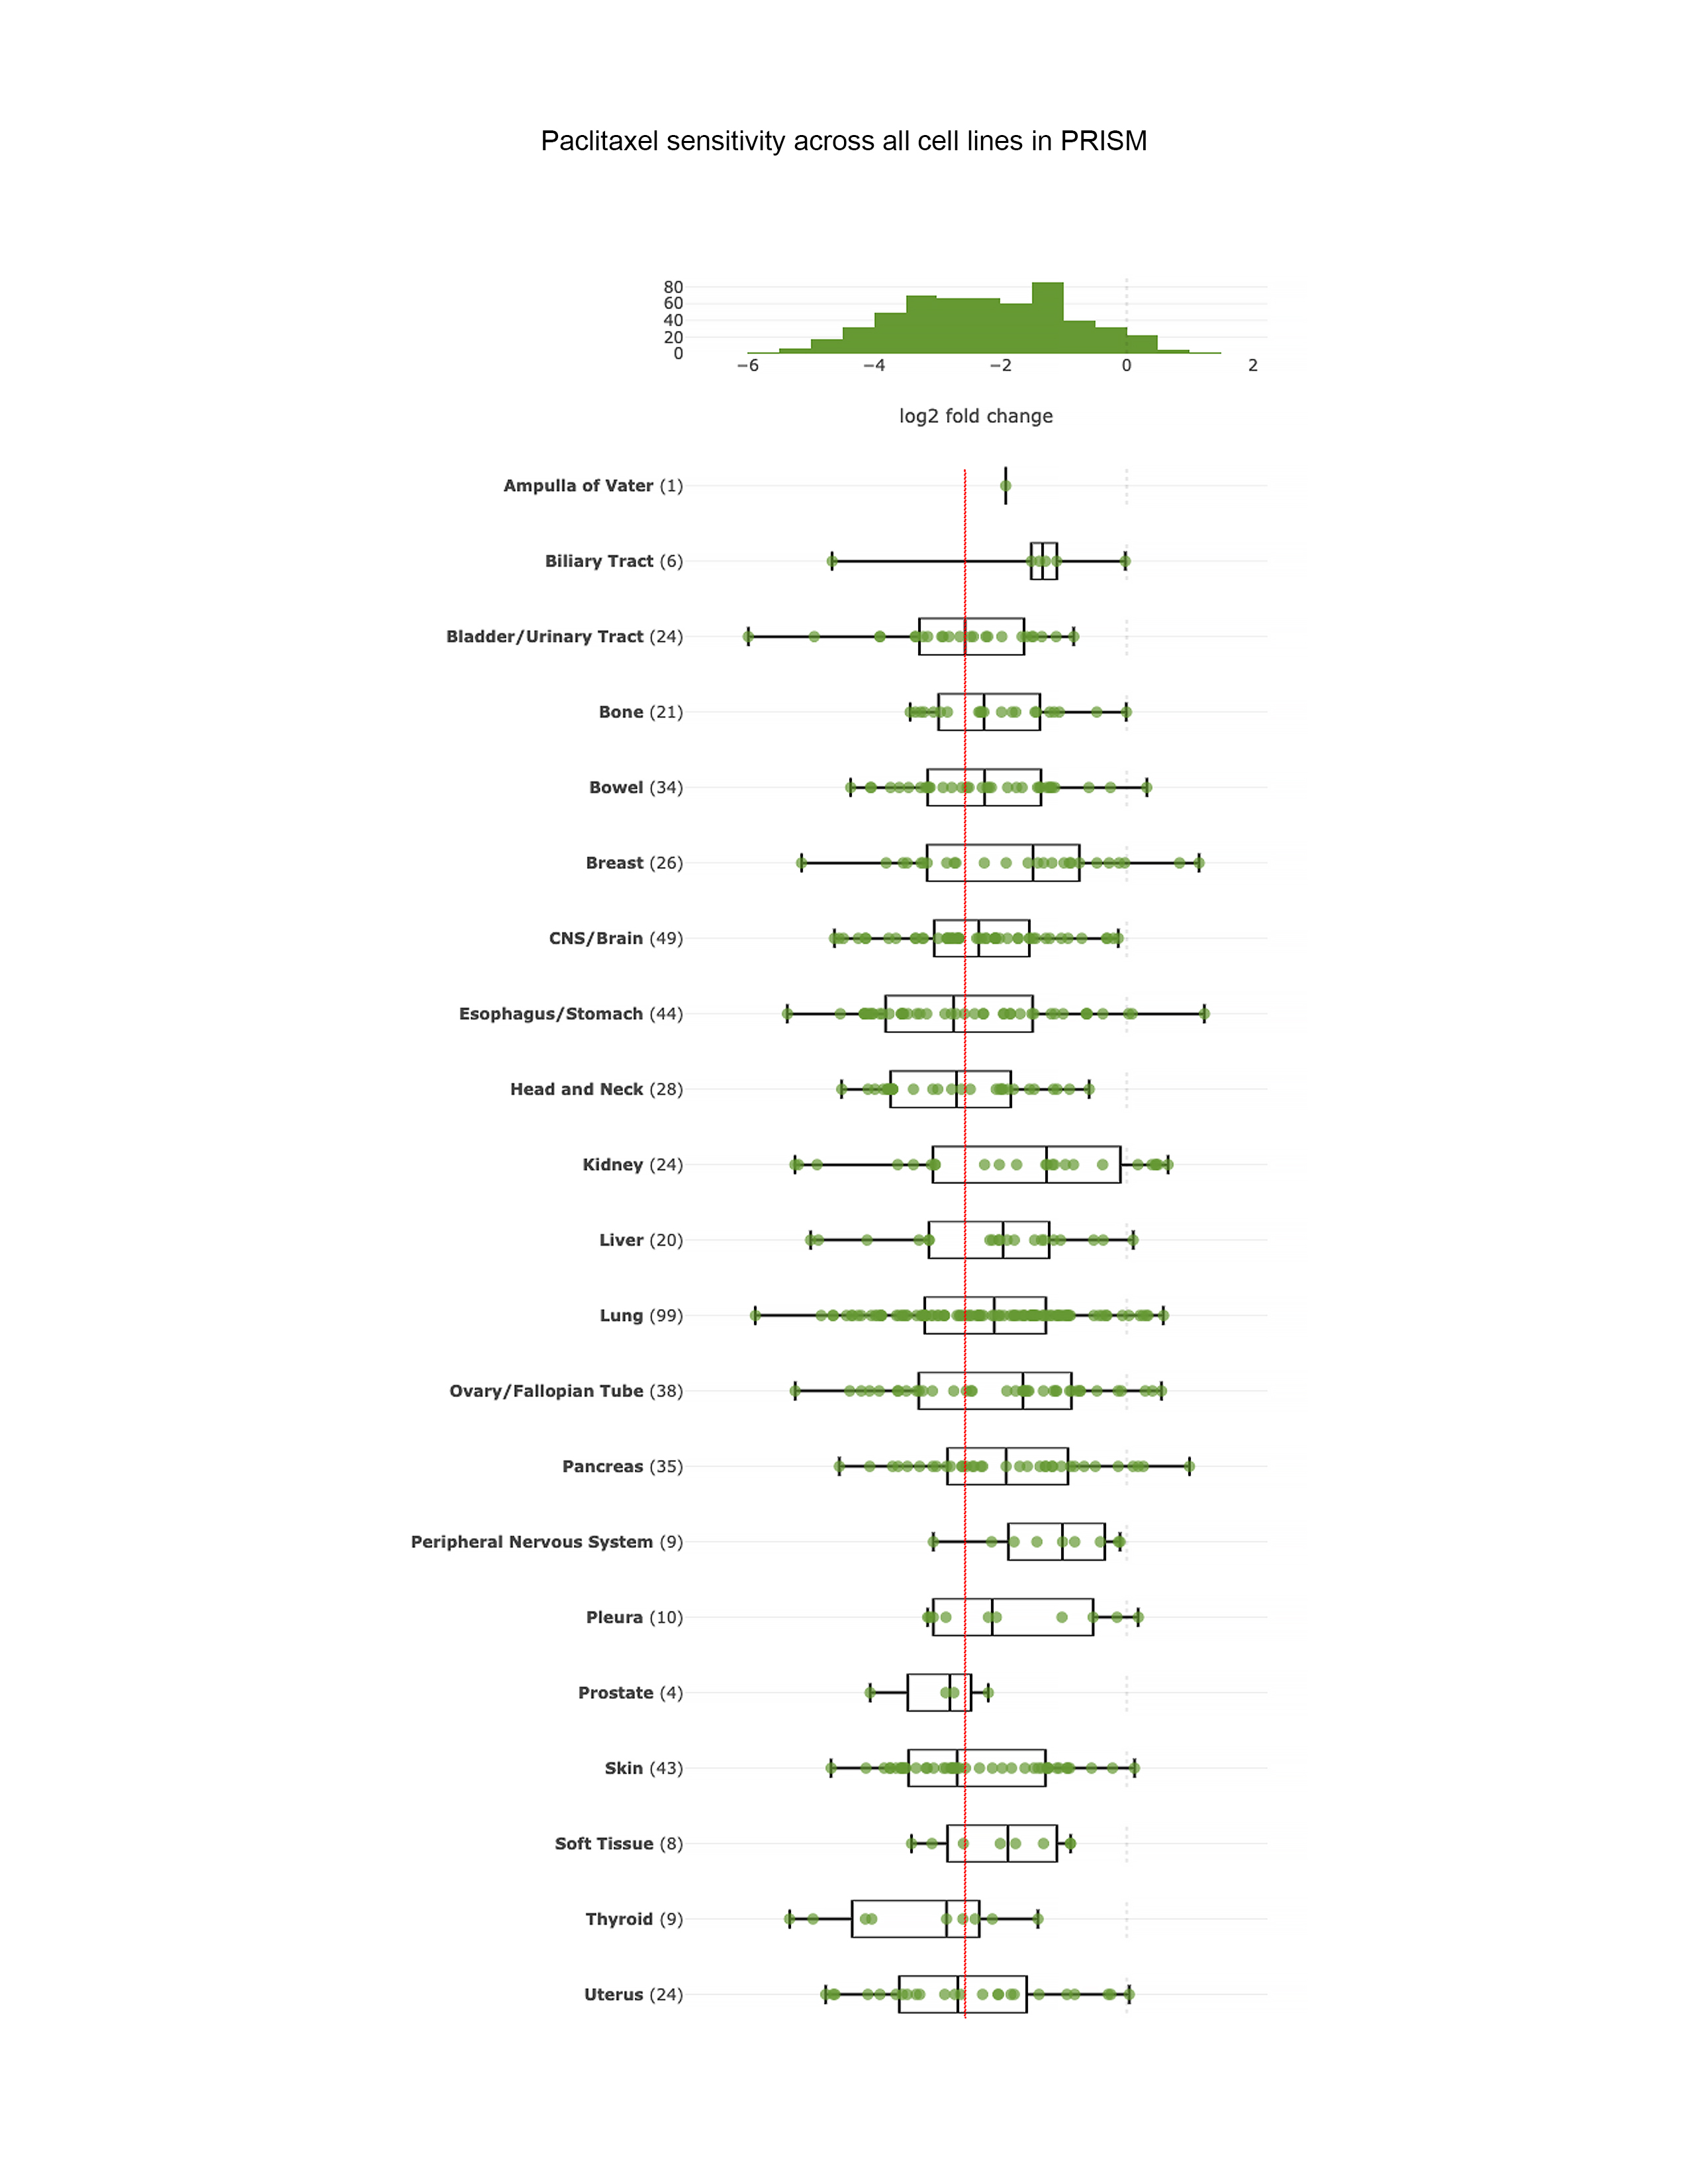


**Figure S1**. BLCA cell lines are among the most sensitive to paclitaxel treatment. Viability analysis as measured by the log2 fold change of barcoded cells at day 5 compared to day 0 (see text for details) of Paclitaxel treatment. In total, 499 cell lines from 21 lineages/cancer types were analyzed and the log2 fold changes for each lineage are plotted as box plots. The median log2 fold change in viability for BLCA cells (-2.55) was lower compared to lung (-2.1), breast (-1.56) or ovarian carcinoma (-1.65) where Paclitaxel is a standard of care treatment.


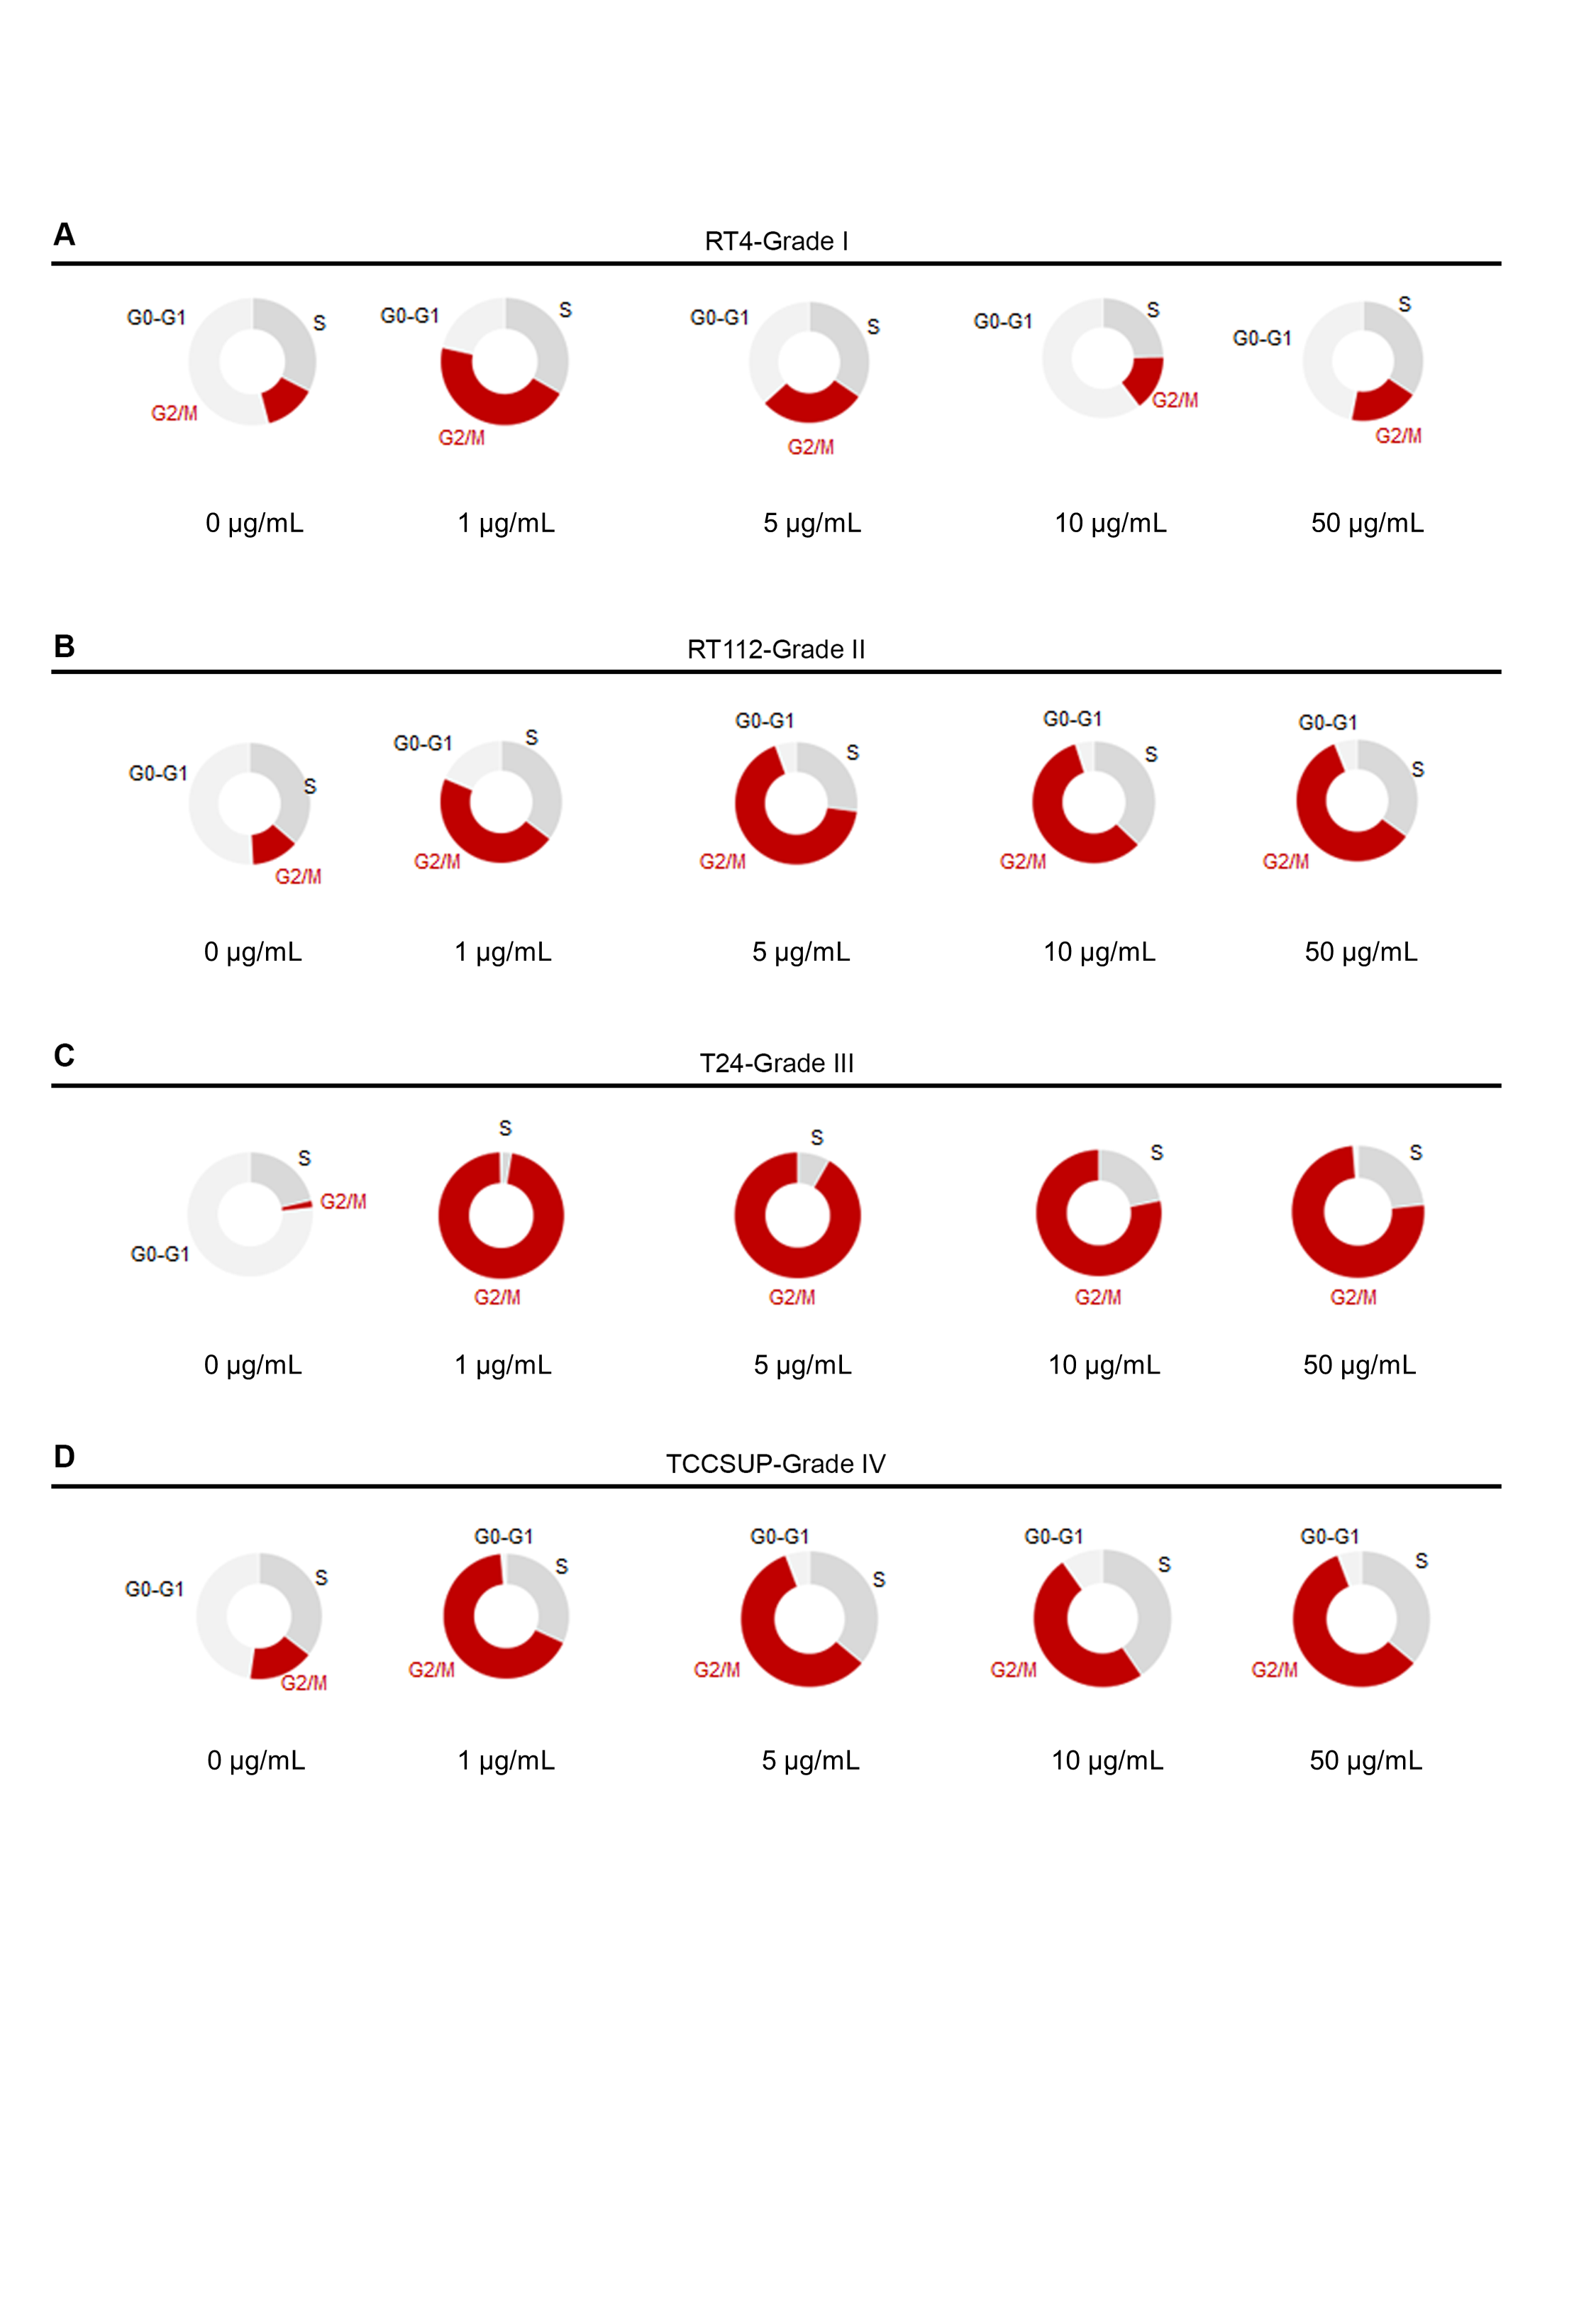


**Figure S2**. Paclitaxel treatment induces cell cycle arrest in BLCA cell lines. (A) Flow cytometry analysis of RT4 cells either untreated (0 μg/mL) or treated with a dose range of Paclitaxel (1-50 μg/mL). (B) Flow cytometry analysis of RT112 cells either untreated (0 μg/mL) or treated with a dose range of Paclitaxel (1-50 μg/mL). (C) Flow cytometry analysis of T24 cells either untreated (0 μg/mL) or treated with a dose range of Paclitaxel (1-50 μg/mL). (D) Flow cytometry analysis of TCCSUP cells either untreated (0 μg/mL) or treated with a dose range of Paclitaxel (1-50 μg/mL).


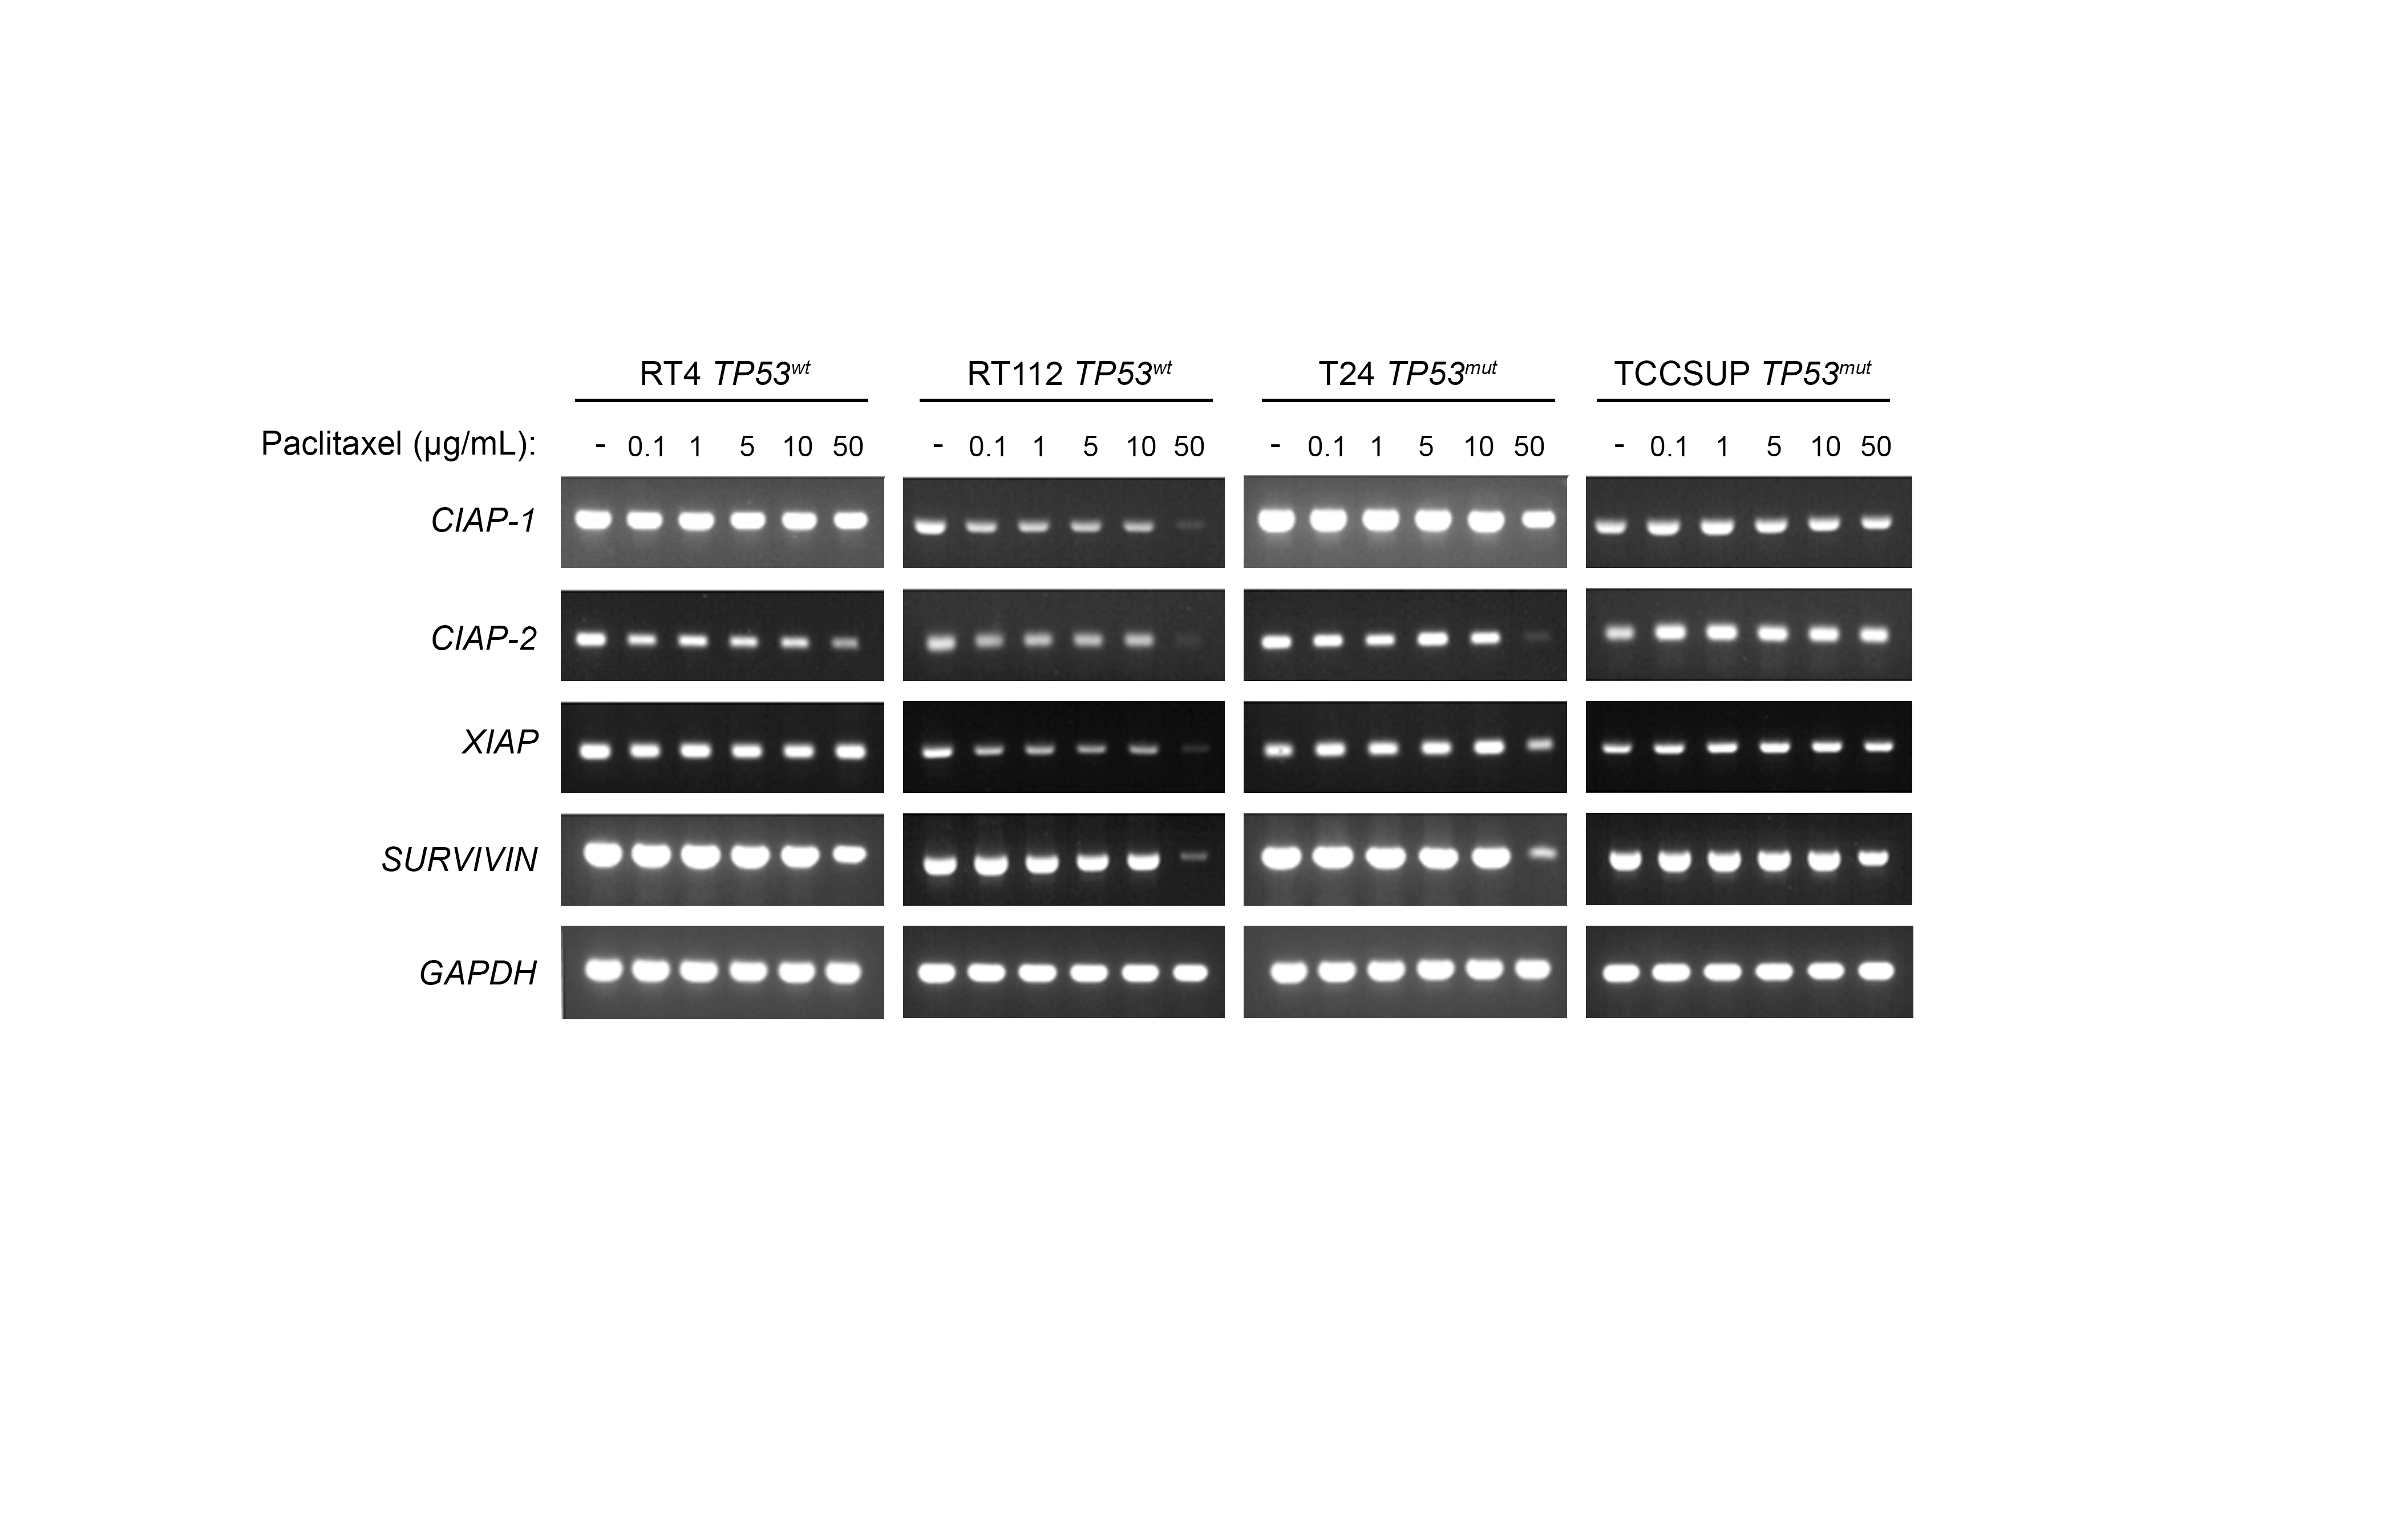


**Figure S3**. BLCA cell lines express high levels of pro-apoptotic genes. RT-sqPCR analysis of total RNA extracted from RT4, RT112, T24 and TCCSUP cells, seeded at ~60 % confluency and exposed to the indicated doses of Paclitaxel for 24 h. Expression of *CIAP-1*, *CIAP-2*, *XIAP* and *SURVIVIN* indicate that BLCA cells have a fully functional pro-apoptotic machinery.


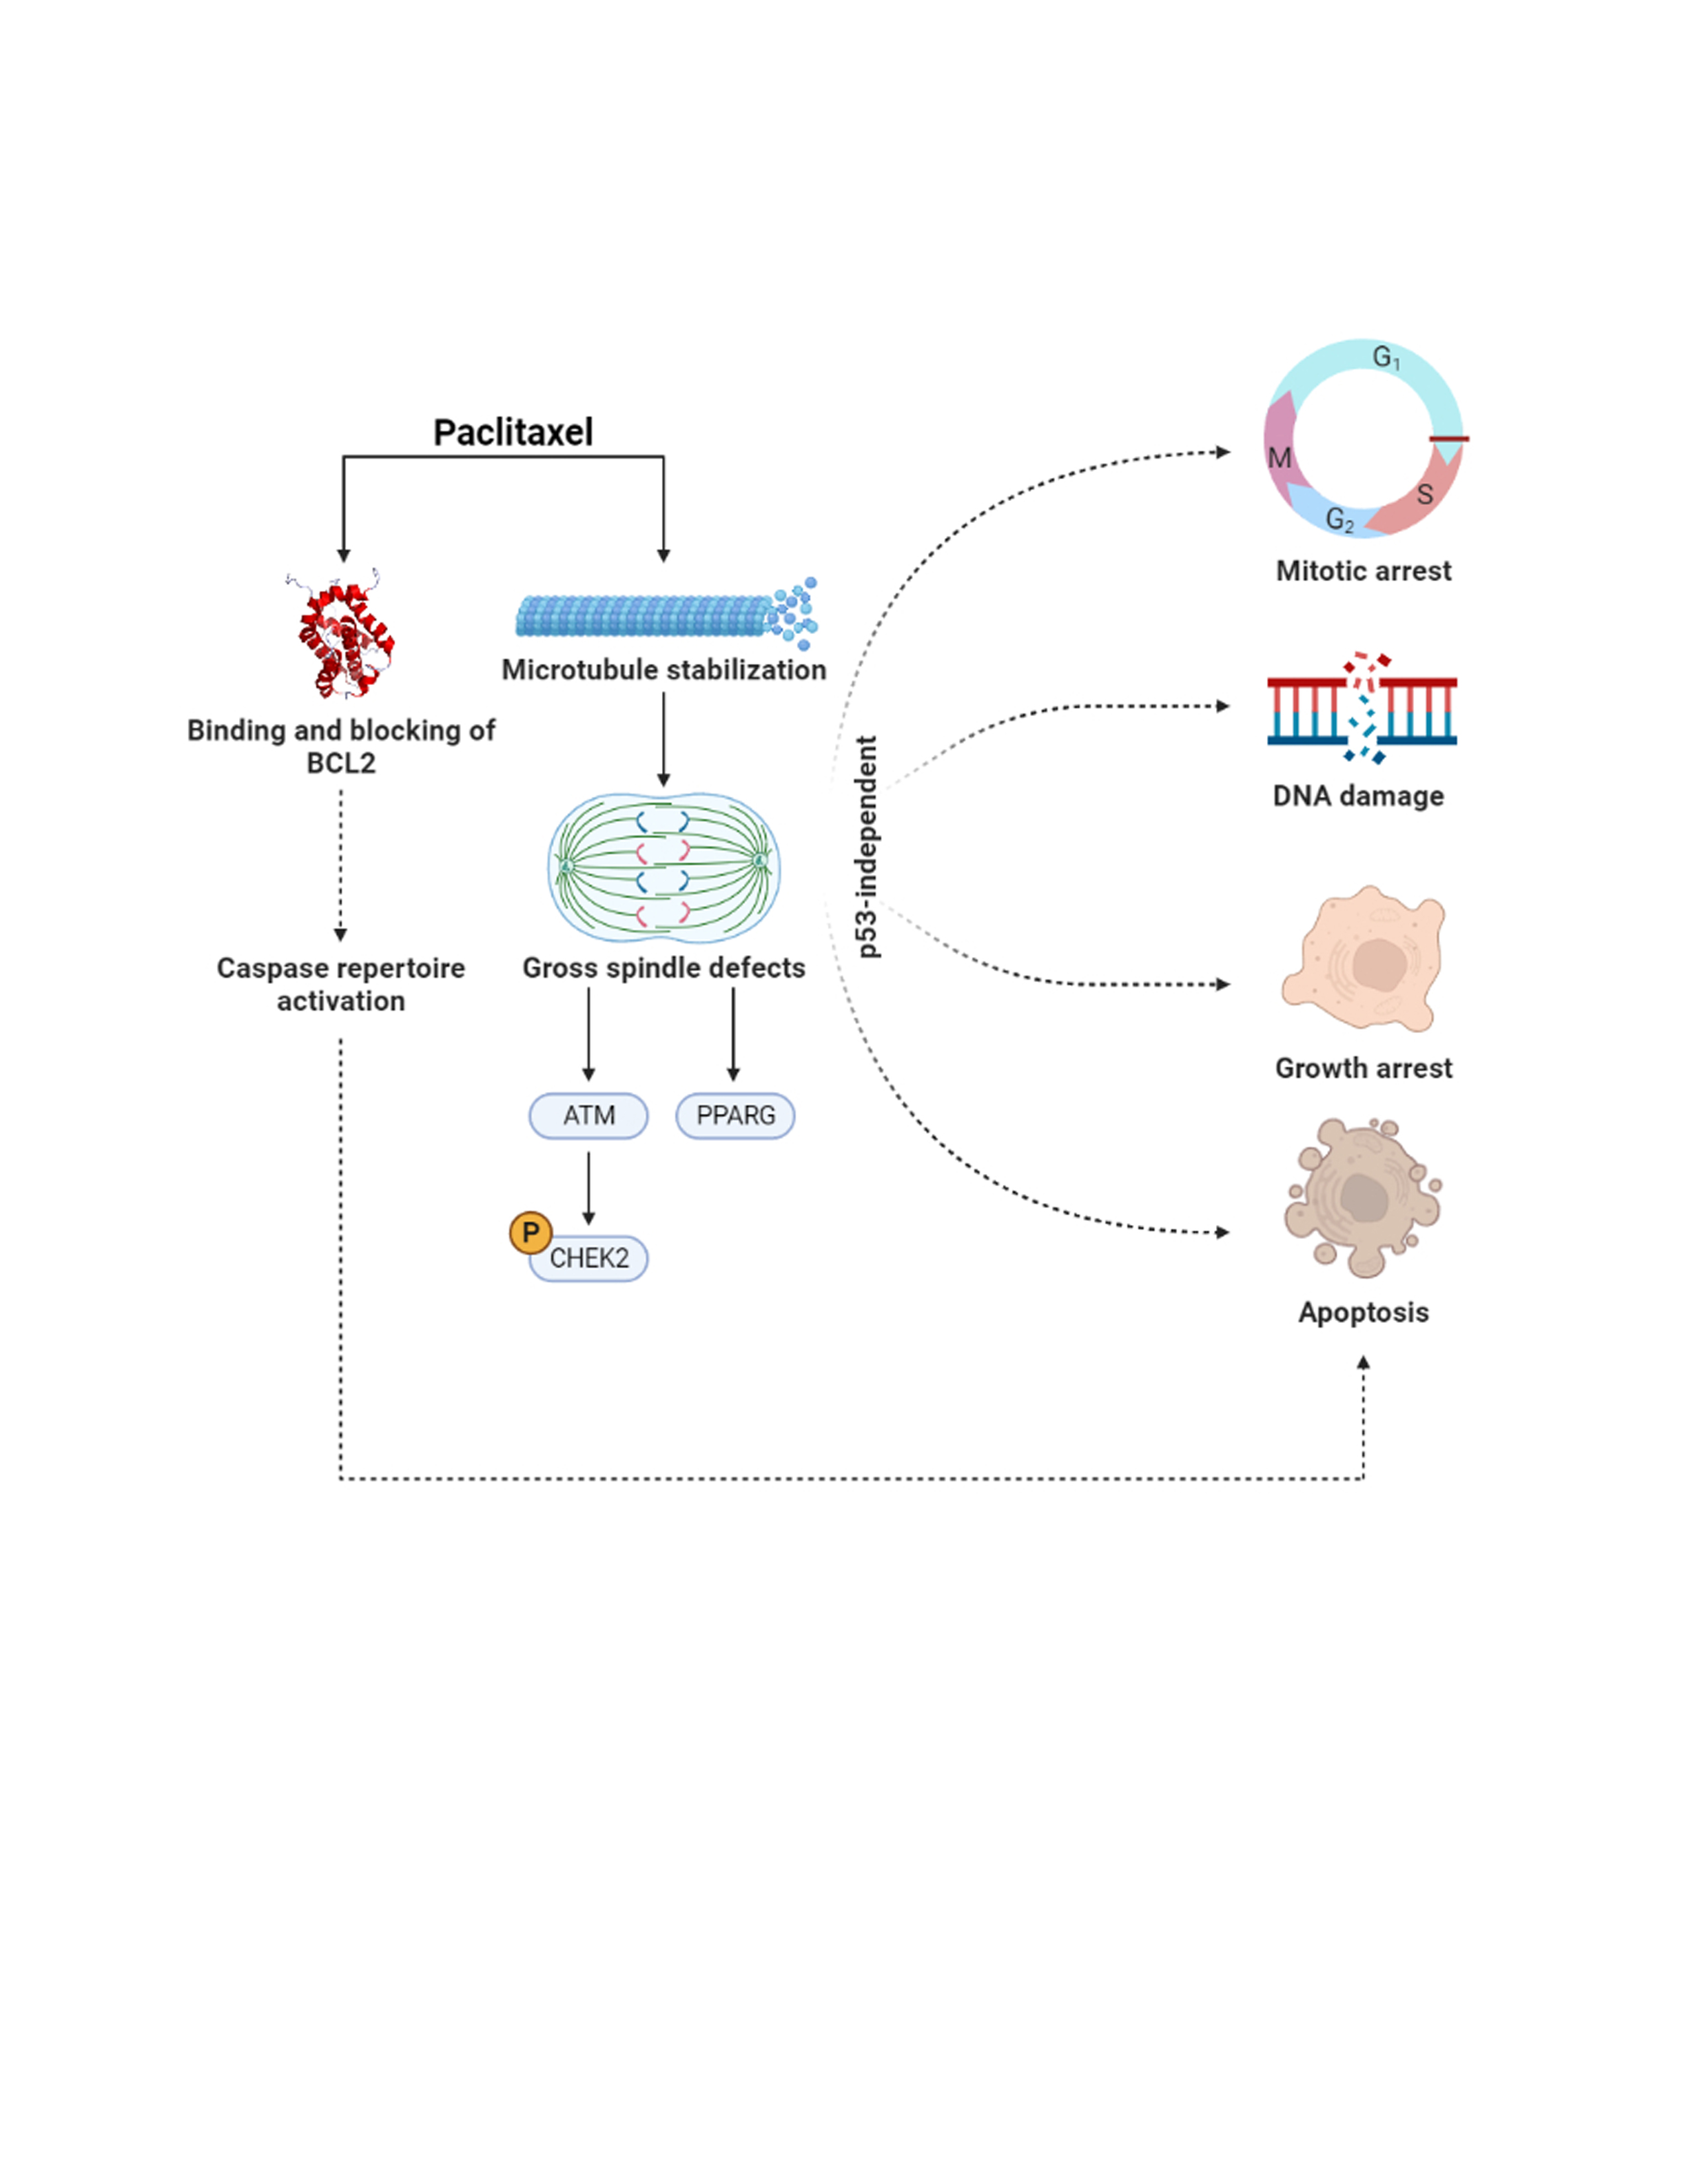


**Figure S4**. Mechanistic model. Paclitaxel treatment blocks microtubule depolymerization and induces an ATM-dependent but p53-independent DNA damage response, which results in G2-M cell cycle arrest, growth arrest and apoptosis. In parallel, paclitaxel can directly bind to BCL2 and block its anti-apoptotic activity, further inducing caspase-mediated apoptosis.
