# Supplementary material for: Microtubule Dynamics Deregulation Induces Apoptosis in Human Urothelial Bladder Cancer Cells via a p53-independent Pathway
Source: Preprints.org preprint supplement (doi:10.20944/preprints202306.1476.v1), 2023-06-21
Supplement: Supplementary file 3 [file Drosos et al Supplementary Tables.xlsx]

## Sheet: Supplementary Table S1
Supplementary Table S1. DNA sequence and annealing/cycling parameters of PCR primers for RT-sqPCR.
		Gene Name	Primer Sequence	Length of PCR Product(s) (bp)	Ta (oC)	Number of Cycles
	1	FASL	F: 5' -CTC TGG AAT GGG AAG ACA CC- 3'	325	57	40
			R: 5' -ACC AGA GAG AGC TCA GAT ACG- 3'
	2	FAS	F: 5' -GGA TGA ACC AGA CTG CGT G- 3'	371 / 308	55	30
			R: 5' -CTG CAT GTT TTC TGT ACT TCC- 3'
	3	BCL2	F: 5' -TGT GGC CTT CTT TGA GTTCG- 3'	222	55	30
			R: 5' -AGC AGA GTC TTC AGA GAC AG- 3'
	4	BCL-XL	F: 5' -CGG GCA TTC AGT GAC CTG AC- 3'	340	57	30
			R: 5' -TCA GGA ACC AGC GGT TGA AG- 3'
	5	PUMA	F: 5' -CAG ACT GTG AAT CCT GTG CT- 3'	251	55	35
			R: 5' -ACA GTA TCT TAC AGG CTG GG- 3'
	6	NOXA	F: 5' -GTG CCC TTG GAA ACG GAA GA- 3'	258	55	35
			R: 5' -CCA GCC GCC CAG TCT AAT CA- 3'
	7	CIAP-1	F: 5' -GCC TTT CTC CAA ACC CTC TT- 3'	356	55	29
			R: 5' -CAT TCG AGC TGC ATG TGT CT- 3'
	8	CIAP-2	F: 5' -GCA GCC ACT GTA TTC AGA AAC- 3'	221	57	30
			R: 5' -TTG CAT ACT ACT AGA TGA CCA C- 3'
	9	XIAP	F: 5' -GAA GAC CCT TGG GAA CAA CA- 3'	225	30	55
			R: 5' -GTC CTT GAA ACT GAA CCC CA- 3'
	10	SURVIVIN	F: 5' -GAG CTG CAG GTT CCT TAT C- 3'	427	53	30
			R: 5' -ACA GCA TCG AGC CAA GTC AT- 3'
	11	GAPDH	F: 5' -TGG TAT CGT GGA AGG ACT CAT GAC- 3'	189	55	28
			R: 5' -ATG CCA GTG AGC TTC CCG TTC AGC- 3'

## Sheet: Supplementary Table S2
Supplementary Table S2. Dependencies enriched in BLCA cell lines (n=32) against all other cell lines in the DepMap database (n=1,063).
Type	Url Label	Gene/Compound	Dataset	T-Statistic	P-Value
gene	PPARG	PPARG	CRISPR (DepMap+Score, Chronos)	-9.23813	1.21309e-19
gene	PPARG	PPARG	CRISPR (DepMap, Chronos)	-8.7931	6.26523e-18
gene	SOX4	SOX4	CRISPR (DepMap+Score, Chronos)	-7.0634	2.8398e-12
gene	RXRA	RXRA	CRISPR (DepMap+Score, Chronos)	-6.57795	7.28846e-11
gene	SOX4	SOX4	CRISPR (DepMap, Chronos)	-6.52094	1.1075e-10
gene	RXRA	RXRA	CRISPR (DepMap, Chronos)	-6.19314	8.60365e-10
gene	CDKAL1	CDKAL1	CRISPR (DepMap+Score, Chronos)	-5.79548	8.83676e-09
gene	SNAP29	SNAP29	CRISPR (DepMap+Score, Chronos)	-5.53785	3.8093e-08
gene	CDKAL1	CDKAL1	CRISPR (DepMap, Chronos)	-5.22574	2.11138e-07
gene	SNAP29	SNAP29	CRISPR (DepMap, Chronos)	-5.13681	3.3591e-07
compound	erlotinib	erlotinib (BRD:BRD-K70401845-003-09-6)	Drug sensitivity (PRISM Repurposing Primary Screen)	-5.01592	7.09642e-07
gene	FLII	FLII	CRISPR (DepMap+Score, Chronos)	-4.95202	8.46726e-07
gene	SOX21	SOX21	CRISPR (DepMap+Score, Chronos)	-4.86503	1.30705e-06
gene	TEAD3	TEAD3	CRISPR (DepMap+Score, Chronos)	-4.79931	1.80627e-06
gene	ARHGEF7	ARHGEF7	CRISPR (DepMap+Score, Chronos)	-4.78964	1.89368e-06
gene	GRHL2	GRHL2	CRISPR (DepMap, Chronos)	-4.75561	2.26918e-06
gene	TEAD3	TEAD3	CRISPR (DepMap, Chronos)	-4.75444	2.28216e-06
gene	ARHGEF7	ARHGEF7	CRISPR (DepMap, Chronos)	-4.7393	2.45538e-06
gene	FLII	FLII	CRISPR (DepMap, Chronos)	-4.71543	2.75437e-06
compound	CP-547632	CP-547632 (BRD:BRD-K00004719-001-01-9)	Repurposing 1M	-4.6827	3.34947e-06
gene	METTL2A	METTL2A	RNAi (Achilles+DRIVE+Marcotte, DEMETER2)	-4.67308	3.55214e-06
gene	TP63	TP63	CRISPR (DepMap, Chronos)	-4.49615	7.73001e-06
gene	LMO4	LMO4	CRISPR (DepMap+Score, Chronos)	-4.47836	8.28761e-06
gene	TP63	TP63	CRISPR (DepMap+Score, Chronos)	-4.47133	8.55978e-06
gene	GRHL2	GRHL2	CRISPR (DepMap+Score, Chronos)	-4.42481	1.0589e-05
compound	RMC-4550	RMC-4550 (BRD:BRD-K00010386-001-01-9)	Repurposing 1M	-4.36944	1.40614e-05
compound	canertinib	canertinib (BRD:BRD-K50168500-001-07-9)	Drug sensitivity (PRISM Repurposing Primary Screen)	-4.35262	1.60074e-05
compound	saracatinib	saracatinib (BRD:BRD-K19540840-001-09-4)	Drug sensitivity AUC (PRISM Repurposing Secondary Screen)	-4.34688	1.60947e-05
compound	naquotinib	naquotinib (BRD:BRD-K64114733-066-03-9)	Repurposing 1M	-4.31902	1.75996e-05
compound	SKLB-1028	SKLB-1028 (BRD:BRD-K00004690-001-01-9)	Repurposing 1M	-4.3	1.91427e-05
gene	SKP2	SKP2	CRISPR (DepMap, Chronos)	-4.29465	1.92038e-05
gene	SOX21	SOX21	CRISPR (DepMap, Chronos)	-4.20148	2.88894e-05
gene	LMO4	LMO4	CRISPR (DepMap, Chronos)	-4.18159	3.14892e-05
compound	NS-018	NS-018 (BRD:BRD-K21865955-003-01-5)	Drug sensitivity (PRISM Repurposing Primary Screen)	-4.12786	4.3309e-05
compound	dacomitinib	dacomitinib (BRD:BRD-K57169635-001-04-5)	Drug sensitivity AUC (PRISM Repurposing Secondary Screen)	-4.1238	4.22381e-05
gene	TNFRSF10B	TNFRSF10B	CRISPR (DepMap, Chronos)	4.14408	3.70082e-05
gene	RAB20	RAB20	CRISPR (DepMap+Score, Chronos)	-4.109	4.26174e-05
gene	ZNF223	ZNF223	RNAi (Achilles, DEMETER2)	4.17068	3.58504e-05
gene	RARG	RARG	CRISPR (DepMap+Score, Chronos)	-4.09566	4.51094e-05
gene	ENOX1	ENOX1	RNAi (Achilles+DRIVE+Marcotte, DEMETER2)	4.12261	4.27846e-05
gene	SKP2	SKP2	CRISPR (DepMap+Score, Chronos)	-4.08619	4.69606e-05
gene	TNNC1	TNNC1	CRISPR (DepMap+Score, Chronos)	-4.04021	5.70261e-05
gene	PSPH	PSPH	CRISPR (DepMap+Score, Chronos)	-3.99873	6.78327e-05
gene	SNX10	SNX10	CRISPR (DepMap+Score, Chronos)	-3.96693	7.74029e-05
gene	VBP1	VBP1	CRISPR (DepMap+Score, Chronos)	-3.96163	7.91397e-05
compound	canertinib	canertinib (BRD:BRD-K50168500-001-07-9)	Drug sensitivity AUC (PRISM Repurposing Secondary Screen)	-3.94717	8.76758e-05
compound	R-268712	R-268712 (BRD:BRD-K83904070-001-02-9)	Repurposing 1M	-3.93736	8.94069e-05
gene	COMMD2	COMMD2	CRISPR (DepMap+Score, Chronos)	-3.9188	9.4354e-05
compound	saracatinib	saracatinib (BRD:BRD-K19540840-001-09-4)	Drug sensitivity (PRISM Repurposing Primary Screen)	-3.91693	0.000100716
gene	MAP6D1	MAP6D1	CRISPR (DepMap+Score, Chronos)	-3.88617	0.000107779
gene	VBP1	VBP1	CRISPR (DepMap, Chronos)	-3.99116	7.05831e-05
compound	VX-745	VX-745 (BRD:BRD-K91900765-001-07-6)	Drug sensitivity AUC (PRISM Repurposing Secondary Screen)	-3.87228	0.000118828
gene	KATNB1	KATNB1	CRISPR (DepMap+Score, Chronos)	-3.86978	0.000115185
gene	HRAS	HRAS	RNAi (Achilles+DRIVE+Marcotte, DEMETER2)	-4.09261	4.75653e-05
compound	OSI-420	OSI-420 (BRD:BRD-K73309154-003-02-8)	Drug sensitivity (PRISM Repurposing Primary Screen)	-3.8101	0.000154235
gene	PIK3R3	PIK3R3	RNAi (Achilles+DRIVE+Marcotte, DEMETER2)	-4.05082	5.66818e-05
gene	FAM50A	FAM50A	CRISPR (DepMap+Score, Chronos)	-3.72755	0.000203003
gene	EPHA2	EPHA2	CRISPR (DepMap, Chronos)	3.93707	8.82023e-05
compound	ubenimex	ubenimex (BRD:BRD-K59574735-001-11-8)	Drug sensitivity AUC (PRISM Repurposing Secondary Screen)	-3.75831	0.000243901
compound	G-15	G-15 (BRD:BRD-M30288325-001-01-4)	Drug sensitivity (PRISM Repurposing Primary Screen)	-3.75636	0.000190485
compound	gefitinib	gefitinib (BRD:BRD-K64052750-001-22-5)	Drug sensitivity AUC (PRISM Repurposing Secondary Screen)	-3.75347	0.000191124
gene	COMMD3	COMMD3	CRISPR (DepMap+Score, Chronos)	-3.71899	0.000209876
gene	CAB39	CAB39	CRISPR (DepMap, Chronos)	3.89335	0.000105434
gene	RARG	RARG	CRISPR (DepMap, Chronos)	-3.89258	0.000105764
gene	WASHC5	WASHC5	CRISPR (DepMap+Score, Chronos)	-3.71613	0.000212233
gene	ACTB	ACTB	CRISPR (DepMap+Score, Chronos)	-3.70032	0.000225733
compound	rucinol	rucinol (BRD:BRD-K61036791-001-01-6)	Drug sensitivity (PRISM Repurposing Primary Screen)	-3.71431	0.000224174
gene	EMX1	EMX1	CRISPR (DepMap+Score, Chronos)	-3.69357	0.000231741
gene	SLC25A32	SLC25A32	RNAi (Achilles+DRIVE+Marcotte, DEMETER2)	3.851	0.000131607
compound	TCS-21311	TCS-21311 (BRD:BRD-K49461364-001-01-0)	Repurposing 1M	-3.69594	0.000233688
gene	RAB20	RAB20	CRISPR (DepMap, Chronos)	-3.7641	0.000176893
gene	SNX10	SNX10	CRISPR (DepMap, Chronos)	-3.75911	0.000180405
compound	CH-170	CH-170 (BRD:BRD-K24820488-001-01-7)	Drug sensitivity (PRISM Repurposing Primary Screen)	-3.66324	0.000272728
gene	KATNB1	KATNB1	CRISPR (DepMap, Chronos)	-3.74221	0.000192802
compound	Y-134	Y-134 (BRD:BRD-K94832621-001-02-3)	Drug sensitivity (PRISM Repurposing Primary Screen)	-3.65181	0.000284914
compound	AZM-475271	AZM-475271 (BRD:BRD-K51329597-001-02-9)	Repurposing 1M	-3.64914	0.000280088
compound	rifapentine	rifapentine (BRD:BRD-K28346421-001-06-8)	Drug sensitivity (PRISM Repurposing Primary Screen)	-3.64672	0.00029523
gene	FAM50A	FAM50A	CRISPR (DepMap, Chronos)	-3.74091	0.000193847
gene	GRK2	GRK2	CRISPR (DepMap+Score, Chronos)	-3.62479	0.000302117
gene	GRHPR	GRHPR	CRISPR (DepMap, Chronos)	3.72309	0.000207801
gene	SETDB2	SETDB2	RNAi (Achilles+DRIVE+Marcotte, DEMETER2)	-3.82295	0.000145687
gene	OR52K2	OR52K2	RNAi (Achilles+DRIVE+Marcotte, DEMETER2)	-3.76638	0.000183659
gene	AK6	AK6	CRISPR (DepMap+Score, Chronos)	-3.58563	0.000350683
gene	LRRIQ4	LRRIQ4	CRISPR (DepMap+Score, Chronos)	-3.57889	0.000359738
gene	IFNA10	IFNA10	RNAi (Achilles+DRIVE+Marcotte, DEMETER2)	3.73974	0.000203709
gene	IP6K2	IP6K2	RNAi (Achilles+DRIVE+Marcotte, DEMETER2)	-3.69643	0.000235546
gene	MKRN2	MKRN2	CRISPR (DepMap+Score, Chronos)	-3.5419	0.000413514
gene	B3GNT5	B3GNT5	CRISPR (DepMap+Score, Chronos)	-3.53831	0.000419111
compound	lapatinib	lapatinib (BRD:BRD-K19687926-379-07-4)	Drug sensitivity (PRISM Repurposing Primary Screen)	-3.55726	0.000406609
compound	vandetanib	vandetanib (BRD:BRD-K77625799-001-07-7)	Drug sensitivity AUC (PRISM Repurposing Secondary Screen)	-3.55519	0.000406672
gene	PFDN1	PFDN1	CRISPR (DepMap+Score, Chronos)	-3.50778	0.000469687
gene	PTGR2	PTGR2	RNAi (Achilles+DRIVE+Marcotte, DEMETER2)	-3.59303	0.000349499
compound	everolimus	everolimus (BRD:BRD-K13514097-001-04-6)	Drug sensitivity AUC (PRISM Repurposing Secondary Screen)	-3.53915	0.000428519
gene	PSPH	PSPH	CRISPR (DepMap, Chronos)	-3.67978	0.000245905
gene	DCST1	DCST1	CRISPR (DepMap+Score, Chronos)	-3.50359	0.000477053
compound	XL647	XL647 (BRD:BRD-K03765900-001-01-9)	Drug sensitivity (PRISM Repurposing Primary Screen)	-3.5353	0.000442426
gene	HERPUD1	HERPUD1	RNAi (Achilles, DEMETER2)	-3.59226	0.00036051
gene	PDZK1IP1	PDZK1IP1	RNAi (Achilles+DRIVE+Marcotte, DEMETER2)	3.57604	0.000372531
gene	TNNC1	TNNC1	CRISPR (DepMap, Chronos)	-3.66082	0.000264577
compound	PCI-29732	PCI-29732 (BRD:BRD-K71223042-001-03-9)	Repurposing 1M	-3.5203	0.000455274
compound	neratinib	neratinib (BRD:BRD-K85606544-001-09-1)	Drug sensitivity AUC (PRISM Repurposing Secondary Screen)	-3.51312	0.000475637
gene	CCDC22	CCDC22	CRISPR (DepMap+Score, Chronos)	-3.50227	0.000479476
gene	PLAAT4	PLAAT4	RNAi (Achilles+DRIVE+Marcotte, DEMETER2)	3.57884	0.000375899
gene	CST7	CST7	CRISPR (DepMap+Score, Chronos)	3.51602	0.00045549
gene	CASP8	CASP8	CRISPR (DepMap, Chronos)	3.6289	0.000299045
compound	ML210	ML210 (CTRP:609110)	Drug sensitivity AUC (CTD^2)	3.5087	0.000477293
gene	NRDE2	NRDE2	CRISPR (DepMap+Score, Chronos)	3.52122	0.000446752
gene	ACTB	ACTB	CRISPR (DepMap, Chronos)	-3.61562	0.000314594
gene	EPHB6	EPHB6	CRISPR (DepMap+Score, Chronos)	3.5564	0.000391589
gene	NUP93	NUP93	CRISPR (DepMap+Score, Chronos)	3.60951	0.000320265
gene	P2RX6	P2RX6	RNAi (Achilles+DRIVE+Marcotte, DEMETER2)	3.57873	0.000376064
gene	NSF	NSF	RNAi (Achilles+DRIVE+Marcotte, DEMETER2)	-3.57241	0.000377636
gene	VILL	VILL	RNAi (Achilles, DEMETER2)	-3.56959	0.00039232
compound	TBOA-(DL)	TBOA-(DL) (BRD:BRD-M77041484-001-01-8)	Drug sensitivity (PRISM Repurposing Primary Screen)	3.58578	0.000365938
gene	GRK2	GRK2	CRISPR (DepMap, Chronos)	-3.60689	0.000325223
gene	CASP8	CASP8	CRISPR (DepMap+Score, Chronos)	3.61218	0.000317019
compound	NGD-94-1	NGD-94-1 (BRD:BRD-K28639661-001-01-6)	Drug sensitivity (PRISM Repurposing Primary Screen)	3.61986	0.000326697
compound	sitagliptin	sitagliptin (CTRP:58442)	Drug sensitivity AUC (CTD^2)	3.62646	0.000361821
gene	TUBGCP3	TUBGCP3	CRISPR (DepMap+Score, Chronos)	3.6288	0.000297518
gene	MAP6D1	MAP6D1	CRISPR (DepMap, Chronos)	-3.56316	0.000383735
gene	COMMD2	COMMD2	CRISPR (DepMap, Chronos)	-3.56199	0.000385426
gene	FOXQ1	FOXQ1	CRISPR (DepMap+Score, Chronos)	3.64449	0.000280141
gene	QRFP	QRFP	CRISPR (DepMap+Score, Chronos)	3.66061	0.000263287
gene	TMBIM1	TMBIM1	CRISPR (DepMap+Score, Chronos)	3.69582	0.000229719
gene	HRAS	HRAS	RNAi (DRIVE, DEMETER2)	-3.54026	0.000449062
compound	quinapril	quinapril (BRD:BRD-K72222507-003-16-8)	Drug sensitivity (PRISM Repurposing Primary Screen)	3.74431	0.000199592
gene	AK6	AK6	CRISPR (DepMap, Chronos)	-3.53873	0.000420556
gene	CAMK1D	CAMK1D	RNAi (Achilles, DEMETER2)	-3.5277	0.000458148
gene	JAZF1	JAZF1	CRISPR (DepMap+Score, Chronos)	3.82389	0.000138566
gene	COMMD3	COMMD3	CRISPR (DepMap, Chronos)	-3.52037	0.000450397
gene	EPHA2	EPHA2	CRISPR (DepMap+Score, Chronos)	4.00297	6.66446e-05
gene	CST7	CST7	CRISPR (DepMap, Chronos)	3.51145	0.000465586
gene	GRHPR	GRHPR	CRISPR (DepMap+Score, Chronos)	4.01312	6.38829e-05
gene	TNFRSF10B	TNFRSF10B	CRISPR (DepMap+Score, Chronos)	4.09008	4.61924e-05
gene	BMPR2	BMPR2	RNAi (Achilles, DEMETER2)	-3.52288	0.000466348
gene	CAB39	CAB39	CRISPR (DepMap+Score, Chronos)	4.11155	4.21563e-05
gene	NEDD4L	NEDD4L	RNAi (Achilles+DRIVE+Marcotte, DEMETER2)	-3.50393	0.000487283
compound	pentacosanoic-acid	pentacosanoic-acid (BRD:BRD-K48996094-001-01-3)	Drug sensitivity (PRISM Repurposing Primary Screen)	4.21916	2.86629e-05

## Sheet: Supplementary Table S3
Supplementary Table S3. Gene Ontology analysis of the 35 genes scored as dependencies in BLCA.
Analysis Type:	PANTHER Overrepresentation Test (Released 20221013)
Annotation Version and Release Date:	GO Ontology database DOI: 10.5281/zenodo.6799722 Released 2022-07-01
Analyzed List:	upload_1 (Homo sapiens)
Reference List:	Homo sapiens (all genes in database)
Test Type:	FISHER
Correction:	FDR
GO cellular component complete	Homo sapiens - REFLIST (20589)	upload_1 (51)	upload_1 (expected)	upload_1 (over/under)	upload_1 (fold Enrichment)	upload_1 (raw P-value)	upload_1 (FDR)
non-membrane-bounded organelle (GO:0043228)	5226	28	12.95	+	2.16	7.26e-06	0.00742
cardiac Troponin complex (GO:1990584)	3	2	0.01	+	> 100	5.96e-05	0.0304
centrosome (GO:0005813)	634	9	1.57	+	5.73	2.47e-05	0.0168
intracellular non-membrane-bounded organelle (GO:0043232)	5225	28	12.94	+	2.16	7.23e-06	0.0148
Non-membrane-bounded organelle (GO:0043228)	2.1296
Intracellular non-membrane-bounded organelle (GO:0043232)	1.82974
Centrosome (GO:0005813)	1.77469
Cardiac troponin complex (GO:1990584)	1.51713

## Sheet: Supplementary Table S4
Supplementary Table S4. Mutational status of the TP53 gene in the 24 BLCA cell lines included in the PRISM analysis.
DepMap ID	paclitaxel (BRD:BRD-K62008436-001-22-1) log2 fold change Drug sensitivity (PRISM Repurposing Primary Screen)	filter	Cell Line Name	Primary Disease	Lineage	Custom cell line group	TP53 mutations
ACH-001321	-2.12741	1	TT	Medullary Thyroid Cancer	Thyroid	out group
ACH-001318	-3.13281	1	PLCPRF5	Hepatocellular Carcinoma	Liver	out group
ACH-001307	-2.40006	1	8505C	Anaplastic Thyroid Cancer	Thyroid	out group
ACH-001306	-4.96567	1	8305C	Anaplastic Thyroid Cancer	Thyroid	out group
ACH-001239	0.122288	1	WM2664	Melanoma	Skin	out group
ACH-001212	-1.03399	1	TTC642	Embryonal Tumor	CNS/Brain	out group
ACH-001211	-1.53902	1	TTC549	Embryonal Tumor	CNS/Brain	out group
ACH-000839	-5.98966	1	SCABER	Bladder Squamous Cell Carcinoma	Bladder/Urinary Tract	in group	NO
ACH-001205	-1.71859	1	TC32	Embryonal Tumor	CNS/Brain	out group
ACH-000234	-5.25117	1	CAKI2	Renal Cell Carcinoma	Kidney	out group
ACH-001193	-3.34772	1	SKPNDW	Embryonal Tumor	CNS/Brain	out group
ACH-001192	-2.29627	1	SKNEP1	Ewing Sarcoma	Bone	out group
ACH-001190	-2.90016	1	SKMEL2	Melanoma	Skin	out group
ACH-000411	-5.19709	1	769P	Renal Cell Carcinoma	Kidney	out group
ACH-001145	-5.24748	1	OC316	Ovarian Epithelial Tumor	Ovary/Fallopian Tube	out group
ACH-001128	-2.65279	1	MON	Embryonal Tumor	CNS/Brain	out group
ACH-001113	-0.0682145	1	LC1SQSF	Non-Small Cell Lung Cancer	Lung	out group
ACH-001099	-1.53844	1	KD	Embryonal Tumor	CNS/Brain	out group
ACH-001075	-4.04176	1	NCIH292	Non-Small Cell Lung Cancer	Lung	out group
ACH-001029	-1.75666	1	CHLA10	Ewing Sarcoma	Bone	out group
ACH-001024	-3.05668	1	CHL1	Melanoma	Skin	out group
ACH-001022	-2.34239	1	CBAGPN	Ewing Sarcoma	Bone	out group
ACH-001016	-2.74215	1	BECKER	Diffuse Glioma	CNS/Brain	out group
ACH-001010	-1.21813	1	A673STAG2NT23	Ewing Sarcoma	Bone	out group
ACH-001009	-1.98167	1	A673STAG2NT14	Ewing Sarcoma	Bone	out group
ACH-001008	-2.95111	1	A673STAG2KO45	Ewing Sarcoma	Bone	out group
ACH-001007	-1.45111	1	A673STAG2KO16	Ewing Sarcoma	Bone	out group
ACH-000998	-2.7702	1	CW2	Colorectal Adenocarcinoma	Bowel	out group
ACH-000997	-4.05627	1	HCT15	Colorectal Adenocarcinoma	Bowel	out group
ACH-000996	-3.33441	1	HEC251	Endometrial Carcinoma	Uterus	out group
ACH-000994	-0.946211	1	HEC59	Endometrial Carcinoma	Uterus	out group
ACH-000991	-1.38087	1	SNU81	Colorectal Adenocarcinoma	Bowel	out group
ACH-000990	-4.61767	1	HEC108	Endometrial Carcinoma	Uterus	out group
ACH-000988	-2.71841	1	MFE319	Endometrial Carcinoma	Uterus	out group
ACH-000987	-3.49247	1	MEWO	Melanoma	Skin	out group
ACH-000986	-2.28681	1	HT115	Colorectal Adenocarcinoma	Bowel	out group
ACH-000985	-1.65571	1	LS411N	Colorectal Adenocarcinoma	Bowel	out group
ACH-000984	-1.78143	1	HEC6	Endometrial Carcinoma	Uterus	out group
ACH-000982	-3.10989	1	GP2D	Colorectal Adenocarcinoma	Bowel	out group
ACH-000979	-2.73608	1	DU145	Prostate Adenocarcinoma	Prostate	out group
ACH-000978	-0.293215	1	EN	Endometrial Carcinoma	Uterus	out group
ACH-000977	-2.86288	1	LNCAPCLONEFGC	Prostate Adenocarcinoma	Prostate	out group
ACH-000976	-4.66118	1	HUCCT1	Intraductal Papillary Neoplasm of the Bile Duct	Biliary Tract	out group
ACH-000974	-3.55049	1	SNGM	Endometrial Carcinoma	Uterus	out group
ACH-000834	-4.94535	1	UMUC1	Bladder Urothelial Carcinoma	Bladder/Urinary Tract	in group	NO
ACH-000972	-0.823276	1	HEC151	Endometrial Carcinoma	Uterus	out group
ACH-000971	-3.26296	1	HCT116	Colorectal Adenocarcinoma	Bowel	out group
ACH-000970	0.316597	1	SNUC5	Colorectal Adenocarcinoma	Bowel	out group
ACH-000968	-3.57582	1	COLO792	Melanoma	Skin	out group
ACH-000967	-2.14188	1	SNUC2A	Colorectal Adenocarcinoma	Bowel	out group
ACH-000966	-0.790522	1	IGROV1	Ovarian Epithelial Tumor	Ovary/Fallopian Tube	out group
ACH-000965	-4.76302	1	RL952	Endometrial Carcinoma	Uterus	out group
ACH-000963	-1.21206	1	CCK81	Colorectal Adenocarcinoma	Bowel	out group
ACH-000962	-3.62849	1	OC314	Ovarian Epithelial Tumor	Ovary/Fallopian Tube	out group
ACH-000961	-3.27531	1	ISHIKAWAHERAKLIO02ER	Endometrial Carcinoma	Uterus	out group
ACH-000959	-3.13088	1	SNUC4	Colorectal Adenocarcinoma	Bowel	out group
ACH-000957	-3.59999	1	LS180	Colorectal Adenocarcinoma	Bowel	out group
ACH-000956	-4.06093	1	22RV1	Prostate Adenocarcinoma	Prostate	out group
ACH-000955	-2.49639	1	SNU407	Colorectal Adenocarcinoma	Bowel	out group
ACH-000954	-2.02823	1	HEC1A	Endometrial Carcinoma	Uterus	out group
ACH-000950	-1.88497	1	LOVO	Colorectal Adenocarcinoma	Bowel	out group
ACH-000948	-3.27293	1	2313287	Esophagogastric Adenocarcinoma	Esophagus/Stomach	out group
ACH-000947	-1.57103	1	OVK18	Ovarian Epithelial Tumor	Ovary/Fallopian Tube	out group
ACH-000946	-3.65145	1	HEC265	Endometrial Carcinoma	Uterus	out group
ACH-000945	-3.64542	1	NCIH650	Non-Small Cell Lung Cancer	Lung	out group
ACH-000943	-3.45264	1	RKO	Colorectal Adenocarcinoma	Bowel	out group
ACH-000941	-0.250888	1	HEC1B	Endometrial Carcinoma	Uterus	out group
ACH-000940	-2.2815	1	AN3CA	Endometrial Carcinoma	Uterus	out group
ACH-000939	-4.64685	1	SKUT1	Uterine Sarcoma/Mesenchymal	Uterus	out group
ACH-000936	-0.875055	1	EFO27	Ovarian Epithelial Tumor	Ovary/Fallopian Tube	out group
ACH-000934	-0.120622	1	MDAMB361	Invasive Breast Carcinoma	Breast	out group
ACH-000929	-2.03227	1	NCIH2110	Non-Small Cell Lung Cancer	Lung	out group
ACH-000927	0.8364	1	BT474	Invasive Breast Carcinoma	Breast	out group
ACH-000926	-3.15071	1	HT55	Colorectal Adenocarcinoma	Bowel	out group
ACH-000924	-1.526	1	NCIH2172	Non-Small Cell Lung Cancer	Lung	out group
ACH-000921	-2.88167	1	NCIH157DM	Non-Small Cell Lung Cancer	Lung	out group
ACH-000919	-2.56767	1	IM95	Esophagogastric Adenocarcinoma	Esophagus/Stomach	out group
ACH-000917	-1.83935	1	TE4	Esophageal Squamous Cell Carcinoma	Esophagus/Stomach	out group
ACH-000916	-2.99189	1	NCIH1573	Non-Small Cell Lung Cancer	Lung	out group
ACH-000915	-2.78428	1	IPC298	Melanoma	Skin	out group
ACH-000913	-3.47422	1	ESS1	Uterine Sarcoma/Mesenchymal	Uterus	out group
ACH-000911	-3.46214	1	NUGC3	Esophagogastric Adenocarcinoma	Esophagus/Stomach	out group
ACH-000909	-2.63171	1	JHUEM2	Endometrial Carcinoma	Uterus	out group
ACH-000906	-3.48854	1	ES2	Ovarian Epithelial Tumor	Ovary/Fallopian Tube	out group
ACH-001163	-4.90082	1	CCLFPEDS0001T	Renal Cell Carcinoma	Kidney	out group
ACH-000903	-1.40422	1	FTC133	Well-Differentiated Thyroid Cancer	Thyroid	out group
ACH-000901	-3.06822	1	HCC1359	Non-Small Cell Lung Cancer	Lung	out group
ACH-000900	-3.19979	1	NCIH23	Non-Small Cell Lung Cancer	Lung	out group
ACH-000899	-2.71818	1	WM88	Melanoma	Skin	out group
ACH-000898	-2.27283	1	SNU719	Esophagogastric Adenocarcinoma	Esophagus/Stomach	out group
ACH-000897	-4.03516	1	FTC238	Well-Differentiated Thyroid Cancer	Thyroid	out group
ACH-000973	-3.90896	1	639V	Urethral Cancer	Bladder/Urinary Tract	in group	YES
ACH-000895	-1.13769	1	CL34	Colorectal Adenocarcinoma	Bowel	out group
ACH-000893	-3.10056	1	NCIH1651	Non-Small Cell Lung Cancer	Lung	out group
ACH-000892	-0.51989	1	NCIH1563	Non-Small Cell Lung Cancer	Lung	out group
ACH-000891	-4.35532	1	HCC1438	Non-Small Cell Lung Cancer	Lung	out group
ACH-000890	-3.25258	1	SW1271	Lung Neuroendocrine Tumor	Lung	out group
ACH-000888	-0.891303	1	NCIH1793	Non-Small Cell Lung Cancer	Lung	out group
ACH-000886	-2.30445	1	NCIH2009	Non-Small Cell Lung Cancer	Lung	out group
ACH-000885	-3.61412	1	TOV21G	Ovarian Epithelial Tumor	Ovary/Fallopian Tube	out group
ACH-000884	-3.15619	1	MDAMB435S	Melanoma	Skin	out group
ACH-000883	-4.55521	1	SW1783	Diffuse Glioma	CNS/Brain	out group
ACH-000882	-2.32976	1	IGR1	Melanoma	Skin	out group
ACH-000881	-2.7585	1	MELJUSO	Melanoma	Skin	out group
ACH-000880	-1.0067	1	AGS	Esophagogastric Adenocarcinoma	Esophagus/Stomach	out group
ACH-000879	-2.03837	1	MFE296	Endometrial Carcinoma	Uterus	out group
ACH-000878	-2.97788	1	HCC15	Non-Small Cell Lung Cancer	Lung	out group
ACH-000875	-1.77392	1	NCIH2347	Non-Small Cell Lung Cancer	Lung	out group
ACH-000873	-4.15315	1	KYSE270	Esophageal Squamous Cell Carcinoma	Esophagus/Stomach	out group
ACH-000869	-1.64481	1	NCIH1568	Non-Small Cell Lung Cancer	Lung	out group
ACH-000868	-1.48526	1	HCC1195	Non-Small Cell Lung Cancer	Lung	out group
ACH-000866	-3.236	1	NCIH1048	Lung Neuroendocrine Tumor	Lung	out group
ACH-000863	-2.08072	1	DBTRG05MG	Diffuse Glioma	CNS/Brain	out group
ACH-000142	-3.90301	1	CAL29	Bladder Urothelial Carcinoma	Bladder/Urinary Tract	in group	YES
ACH-000860	-1.1837	1	NCIH358	Non-Small Cell Lung Cancer	Lung	out group
ACH-000859	-5.14673	1	HCC1954	Breast Ductal Carcinoma In Situ	Breast	out group
ACH-000858	-2.64878	1	KNS62	Non-Small Cell Lung Cancer	Lung	out group
ACH-000856	-3.2557	1	CAL51	Invasive Breast Carcinoma	Breast	out group
ACH-000855	-1.95206	1	KYSE150	Esophageal Squamous Cell Carcinoma	Esophagus/Stomach	out group
ACH-000853	-2.68568	1	NCIH661	Non-Small Cell Lung Cancer	Lung	out group
ACH-000852	-2.00814	1	NCIH1435	Non-Small Cell Lung Cancer	Lung	out group
ACH-000849	-2.72864	1	MDAMB468	Invasive Breast Carcinoma	Breast	out group
ACH-000848	-4.10937	1	JHH7	Hepatocellular Carcinoma	Liver	out group
ACH-000847	-2.77592	1	HGC27	Esophagogastric Adenocarcinoma	Esophagus/Stomach	out group
ACH-000846	-1.15875	1	FADU	Head and Neck Squamous Cell Carcinoma	Head and Neck	out group
ACH-000845	-2.33664	1	NCIH1373	Non-Small Cell Lung Cancer	Lung	out group
ACH-000843	-1.43472	1	HARA	Non-Small Cell Lung Cancer	Lung	out group
ACH-000842	-0.256857	1	SW480	Colorectal Adenocarcinoma	Bowel	out group
ACH-000841	-1.46983	1	NCIH2087	Non-Small Cell Lung Cancer	Lung	out group
ACH-000840	-2.62992	1	HCC366	Non-Small Cell Lung Cancer	Lung	out group
ACH-000046	-3.62386	1	ACHN	Renal Cell Carcinoma	Kidney	out group
ACH-000837	-1.45896	1	NCIH322	Non-Small Cell Lung Cancer	Lung	out group
ACH-000836	-1.97833	1	YD15	Head and Neck Squamous Cell Carcinoma	Head and Neck	out group
ACH-000835	-2.58516	1	GCT	Undifferentiated Pleomorphic Sarcoma/Malignant Fibrous Histiocytoma/High-Grade Spindle Cell Sarcoma	Soft Tissue	out group
ACH-000375	-3.37592	1	G402	Renal Cell Carcinoma	Kidney	out group
ACH-000833	-1.31704	1	RH30	Rhabdomyosarcoma	Soft Tissue	out group
ACH-000832	-2.06561	1	CAL27	Head and Neck Squamous Cell Carcinoma	Head and Neck	out group
ACH-000827	-3.17712	1	WM793	Melanoma	Skin	out group
ACH-000826	-0.328004	1	CAL12T	Non-Small Cell Lung Cancer	Lung	out group
ACH-000824	-5.36855	1	KYSE510	Esophageal Squamous Cell Carcinoma	Esophagus/Stomach	out group
ACH-000823	-3.75862	1	KYSE140	Esophageal Squamous Cell Carcinoma	Esophagus/Stomach	out group
ACH-000822	-2.55168	1	SKMEL24	Melanoma	Skin	out group
ACH-000819	-4.48425	1	LN18	Diffuse Glioma	CNS/Brain	out group
ACH-000814	-1.4003	1	HS939T	Melanoma	Skin	out group
ACH-000813	-3.60731	1	T3M10	Non-Small Cell Lung Cancer	Lung	out group
ACH-000812	-3.74447	1	COLO783	Melanoma	Skin	out group
ACH-000811	-1.126	1	SKOV3	Ovarian Epithelial Tumor	Ovary/Fallopian Tube	out group
ACH-000810	-0.224974	1	SKMEL30	Melanoma	Skin	out group
ACH-000809	-4.14299	1	KYSE410	Esophageal Squamous Cell Carcinoma	Esophagus/Stomach	out group
ACH-000808	-1.28761	1	HUH28	Intraductal Papillary Neoplasm of the Bile Duct	Biliary Tract	out group
ACH-000805	-1.97016	1	COLO679	Melanoma	Skin	out group
ACH-000804	-2.13865	1	NB1	Neuroblastoma	Peripheral Nervous System	out group
ACH-000803	-1.32807	1	COLO668	Lung Neuroendocrine Tumor	Lung	out group
ACH-000862	-3.34982	1	KMBC2	Bladder Urothelial Carcinoma	Bladder/Urinary Tract	in group	YES
ACH-000800	-1.49393	1	NCIH446	Lung Neuroendocrine Tumor	Lung	out group
ACH-000796	-4.07041	1	MCAS	Ovarian Epithelial Tumor	Ovary/Fallopian Tube	out group
ACH-000794	-1.95986	1	BICR22	Head and Neck Squamous Cell Carcinoma	Head and Neck	out group
ACH-000566	-3.33436	1	SW1710	Bladder Urothelial Carcinoma	Bladder/Urinary Tract	in group	YES
ACH-000791	-0.948627	1	RERFLCAD1	Non-Small Cell Lung Cancer	Lung	out group
ACH-000788	-4.67754	1	A2058	Melanoma	Skin	out group
ACH-000787	-2.90337	1	LXF289	Non-Small Cell Lung Cancer	Lung	out group
ACH-000785	0.257727	1	NCIH2126	Non-Small Cell Lung Cancer	Lung	out group
ACH-000784	-1.1964	1	KYSE70	Esophageal Squamous Cell Carcinoma	Esophagus/Stomach	out group
ACH-000783	1.14564	1	CAMA1	Invasive Breast Carcinoma	Breast	out group
ACH-000781	-1.09385	1	NCIH2023	Non-Small Cell Lung Cancer	Lung	out group
ACH-000778	-3.85244	1	HSC3	Head and Neck Squamous Cell Carcinoma	Head and Neck	out group
ACH-000777	-3.32002	1	KYSE30	Esophageal Squamous Cell Carcinoma	Esophagus/Stomach	out group
ACH-000776	-1.71986	1	ONS76	Embryonal Tumor	CNS/Brain	out group
ACH-000775	0.309149	1	NCIH727	Lung Neuroendocrine Tumor	Lung	out group
ACH-000774	0.582585	1	RERFLCAD2	Non-Small Cell Lung Cancer	Lung	out group
ACH-000771	-1.79156	1	BICR56	Head and Neck Squamous Cell Carcinoma	Head and Neck	out group
ACH-000769	-3.97594	1	LK2	Non-Small Cell Lung Cancer	Lung	out group
ACH-000768	-2.70388	1	MDAMB231	Invasive Breast Carcinoma	Breast	out group
ACH-000766	-4.64205	1	NCIH1648	Non-Small Cell Lung Cancer	Lung	out group
ACH-000765	-1.2382	1	WM983B	Melanoma	Skin	out group
ACH-000764	-4.02859	1	SH10TC	Esophagogastric Adenocarcinoma	Esophagus/Stomach	out group
ACH-000762	-3.79003	1	YD38	Head and Neck Squamous Cell Carcinoma	Head and Neck	out group
ACH-000759	-0.278768	1	MDAMB175VII	Invasive Breast Carcinoma	Breast	out group
ACH-000758	1.23033	1	MKN74	Esophagogastric Adenocarcinoma	Esophagus/Stomach	out group
ACH-000756	-1.88695	1	GI1	Diffuse Glioma	CNS/Brain	out group
ACH-000896	-3.22638	1	647V	Bladder Urothelial Carcinoma	Bladder/Urinary Tract	in group	NO
ACH-000750	-3.33323	1	LOXIMVI	Melanoma	Skin	out group
ACH-000749	-1.84007	1	DMS273	Lung Neuroendocrine Tumor	Lung	out group
ACH-000748	-1.1483	1	SJSA1	Osteosarcoma	Bone	out group
ACH-000747	-3.32579	1	NCIH1703	Non-Small Cell Lung Cancer	Lung	out group
ACH-000396	-3.14986	1	J82	Bladder Urothelial Carcinoma	Bladder/Urinary Tract	in group	YES
ACH-000740	-3.06955	1	A253	Head and Neck Squamous Cell Carcinoma	Head and Neck	out group
ACH-000739	-2.01771	1	HEPG2	Hepatoblastoma	Liver	out group
ACH-000738	-0.209778	1	GB1	Diffuse Glioma	CNS/Brain	out group
ACH-000736	-4.06778	1	SNU601	Esophagogastric Adenocarcinoma	Esophagus/Stomach	out group
ACH-000735	-3.70173	1	PECAPJ49	Head and Neck Squamous Cell Carcinoma	Head and Neck	out group
ACH-000734	-3.28748	1	JHH5	Hepatocellular Carcinoma	Liver	out group
ACH-000733	-0.917902	1	NCIH1838	Non-Small Cell Lung Cancer	Lung	out group
ACH-000732	-3.77278	1	PECAPJ41CLONED2	Head and Neck Squamous Cell Carcinoma	Head and Neck	out group
ACH-000730	-1.46857	1	SKMEL5	Melanoma	Skin	out group
ACH-000726	-2.70369	1	TE14	Esophageal Squamous Cell Carcinoma	Esophagus/Stomach	out group
ACH-000189	-3.09252	1	RCC10RGB	Renal Cell Carcinoma	Kidney	out group
ACH-000723	-3.98486	1	YD10B	Head and Neck Squamous Cell Carcinoma	Head and Neck	out group
ACH-000721	-3.53913	1	HMC18	Invasive Breast Carcinoma	Breast	out group
ACH-000171	-3.0387	1	VMRCRCZ	Renal Cell Carcinoma	Kidney	out group
ACH-000719	-1.60815	1	RMGI	Ovarian Epithelial Tumor	Ovary/Fallopian Tube	out group
ACH-000717	-4.53269	1	COLO680N	Esophageal Squamous Cell Carcinoma	Esophagus/Stomach	out group
ACH-000716	-4.13568	1	TT2609C02	Well-Differentiated Thyroid Cancer	Thyroid	out group
ACH-000715	-1.46495	1	SNU1214	Head and Neck Squamous Cell Carcinoma	Head and Neck	out group
ACH-000713	-1.54863	1	CAOV3	Ovarian Epithelial Tumor	Ovary/Fallopian Tube	out group
ACH-000711	-3.8076	1	JIMT1	Invasive Breast Carcinoma	Breast	out group
ACH-000706	-3.47715	1	EKVX	Non-Small Cell Lung Cancer	Lung	out group
ACH-000704	0.293411	1	OAW42	Ovarian Epithelial Tumor	Ovary/Fallopian Tube	out group
ACH-000701	-1.63344	1	RMUGS	Ovarian Epithelial Tumor	Ovary/Fallopian Tube	out group
ACH-000699	-0.879694	1	HCC1395	Invasive Breast Carcinoma	Breast	out group
ACH-000698	0.033612	1	DMS53	Lung Neuroendocrine Tumor	Lung	out group
ACH-000696	-4.38364	1	OVCAR8	Ovarian Epithelial Tumor	Ovary/Fallopian Tube	out group
ACH-000694	-1.50393	1	TE9	Esophageal Squamous Cell Carcinoma	Esophagus/Stomach	out group
ACH-000693	-3.56577	1	KYSE180	Esophageal Squamous Cell Carcinoma	Esophagus/Stomach	out group
ACH-000692	-1.87589	1	SNU899	Head and Neck Squamous Cell Carcinoma	Head and Neck	out group
ACH-000688	-1.10643	1	OV7	Ovarian Epithelial Tumor	Ovary/Fallopian Tube	out group
ACH-000686	0.100965	1	SNU878	Hepatocellular Carcinoma	Liver	out group
ACH-000685	-3.27891	1	L33	Adenosquamous Carcinoma of the Pancreas	Pancreas	out group
ACH-000096	-3.02914	1	G401	Rhabdoid Cancer	Kidney	out group
ACH-000682	-2.47658	1	SNU1066	Head and Neck Squamous Cell Carcinoma	Head and Neck	out group
ACH-000681	-0.961045	1	A549	Non-Small Cell Lung Cancer	Lung	out group
ACH-000680	-2.90792	1	SW948	Colorectal Adenocarcinoma	Bowel	out group
ACH-000679	-0.628796	1	OE19	Esophageal Squamous Cell Carcinoma	Esophagus/Stomach	out group
ACH-000678	-1.94204	1	MKN7	Esophagogastric Adenocarcinoma	Esophagus/Stomach	out group
ACH-000677	-1.41016	1	SW1573	Non-Small Cell Lung Cancer	Lung	out group
ACH-000674	-4.09944	1	NUGC4	Esophagogastric Adenocarcinoma	Esophagus/Stomach	out group
ACH-000672	-1.26575	1	IALM	Non-Small Cell Lung Cancer	Lung	out group
ACH-000671	-0.523155	1	HUH6	Hepatoblastoma	Liver	out group
ACH-000670	-3.55211	1	SBC5	Lung Neuroendocrine Tumor	Lung	out group
ACH-000669	-3.54233	1	SW900	Non-Small Cell Lung Cancer	Lung	out group
ACH-000667	-2.48561	1	HCC44	Non-Small Cell Lung Cancer	Lung	out group
ACH-000666	-2.34036	1	NCIH1355	Non-Small Cell Lung Cancer	Lung	out group
ACH-000665	-2.33962	1	SKMES1	Non-Small Cell Lung Cancer	Lung	out group
ACH-000663	-1.89747	1	OVTOKO	Ovarian Epithelial Tumor	Ovary/Fallopian Tube	out group
ACH-000662	-1.51485	1	CORL23	Non-Small Cell Lung Cancer	Lung	out group
ACH-000661	-1.34216	1	WM1799	Melanoma	Skin	out group
ACH-000657	-3.91768	1	A2780	Ovarian Epithelial Tumor	Ovary/Fallopian Tube	out group
ACH-000652	-1.69454	1	SUIT2	Pancreatic Adenocarcinoma	Pancreas	out group
ACH-000651	-1.21692	1	SW620	Colorectal Adenocarcinoma	Bowel	out group
ACH-000650	-3.7466	1	IGR37	Melanoma	Skin	out group
ACH-000486	-2.92846	1	KU1919	Bladder Urothelial Carcinoma	Bladder/Urinary Tract	in group	NO
ACH-000648	-1.02449	1	NCIH28	Pleural Mesothelioma	Pleura	out group
ACH-000647	-1.84757	1	TE1	Esophageal Squamous Cell Carcinoma	Esophagus/Stomach	out group
ACH-000645	-3.15074	1	JL1	Pleural Mesothelioma	Pleura	out group
ACH-000644	-1.26591	1	COLO829	Melanoma	Skin	out group
ACH-000643	-3.47603	1	HDQP1	Invasive Breast Carcinoma	Breast	out group
ACH-000638	-1.04725	1	NCIH441	Non-Small Cell Lung Cancer	Lung	out group
ACH-000637	-1.68837	1	KYSE520	Esophageal Squamous Cell Carcinoma	Esophagus/Stomach	out group
ACH-000632	-3.83907	1	HS944T	Melanoma	Skin	out group
ACH-000631	-0.305889	1	KS1	Diffuse Glioma	CNS/Brain	out group
ACH-000630	-2.0109	1	YD8	Head and Neck Squamous Cell Carcinoma	Head and Neck	out group
ACH-000628	-0.930993	1	NCIH596	Non-Small Cell Lung Cancer	Lung	out group
ACH-000627	-4.25483	1	LCLC103H	Non-Small Cell Lung Cancer	Lung	out group
ACH-000625	-1.45786	1	HEP3B217	Hepatocellular Carcinoma	Liver	out group
ACH-000624	-1.18252	1	HCC1806	Breast Ductal Carcinoma In Situ	Breast	out group
ACH-000623	-2.30261	1	SNU201	Diffuse Glioma	CNS/Brain	out group
ACH-000622	-4.62619	1	KNS42	Diffuse Glioma	CNS/Brain	out group
ACH-000620	-1.77881	1	JHH1	Hepatocellular Carcinoma	Liver	out group
ACH-000619	-2.77021	1	PECAPJ15	Head and Neck Squamous Cell Carcinoma	Head and Neck	out group
ACH-000618	-3.70697	1	SNU1041	Head and Neck Squamous Cell Carcinoma	Head and Neck	out group
ACH-000617	-0.903563	1	OVCAR4	Ovarian Epithelial Tumor	Ovary/Fallopian Tube	out group
ACH-000616	-1.46953	1	HS746T	Esophagogastric Adenocarcinoma	Esophagus/Stomach	out group
ACH-000614	-1.06907	1	RVH421	Melanoma	Skin	out group
ACH-000613	-3.34448	1	HOS	Osteosarcoma	Bone	out group
ACH-000609	-4.24814	1	SF126	Diffuse Glioma	CNS/Brain	out group
ACH-000608	-0.734656	1	COV644	Ovarian Epithelial Tumor	Ovary/Fallopian Tube	out group
ACH-000605	-3.54382	1	TE6	Esophageal Squamous Cell Carcinoma	Esophagus/Stomach	out group
ACH-000603	-1.31467	1	BEN	Non-Small Cell Lung Cancer	Lung	out group
ACH-000601	-3.06926	1	MIAPACA2	Pancreatic Adenocarcinoma	Pancreas	out group
ACH-000599	-1.5723	1	PATU8902	Pancreatic Adenocarcinoma	Pancreas	out group
ACH-000597	-1.43862	1	TTC709	Embryonal Tumor	CNS/Brain	out group
ACH-000595	-2.34178	1	LN229	Diffuse Glioma	CNS/Brain	out group
ACH-000018	-2.90511	1	T24	Bladder Urothelial Carcinoma	Bladder/Urinary Tract	in group	YES
ACH-000592	-2.67609	1	TM31	Diffuse Glioma	CNS/Brain	out group
ACH-000590	-0.314131	1	NCIH2073	Non-Small Cell Lung Cancer	Lung	out group
ACH-000589	-3.1827	1	NCIH1437	Non-Small Cell Lung Cancer	Lung	out group
ACH-000587	-2.37859	1	NCIH1975	Non-Small Cell Lung Cancer	Lung	out group
ACH-000582	-2.85847	1	COLO741	Melanoma	Skin	out group
ACH-000580	-3.55824	1	C32	Melanoma	Skin	out group
ACH-000579	-2.76257	1	UACC257	Melanoma	Skin	out group
ACH-000573	-3.22299	1	MDAMB436	Invasive Breast Carcinoma	Breast	out group
ACH-000572	-2.68451	1	G361	Melanoma	Skin	out group
ACH-000571	-3.65343	1	T98G	Diffuse Glioma	CNS/Brain	out group
ACH-000570	-2.68545	1	YKG1	Diffuse Glioma	CNS/Brain	out group
ACH-000569	-2.86144	1	ISTMES1	Pleural Mesothelioma	Pleura	out group
ACH-000905	-2.81319	1	5637	Bladder Urothelial Carcinoma	Bladder/Urinary Tract	in group	YES
ACH-000565	-3.73853	1	RCM1	Colorectal Adenocarcinoma	Bowel	out group
ACH-000563	-2.52269	1	EBC1	Non-Small Cell Lung Cancer	Lung	out group
ACH-000562	0.206415	1	HCC78	Non-Small Cell Lung Cancer	Lung	out group
ACH-000561	-3.16546	1	TDOTT	Esophageal Squamous Cell Carcinoma	Esophagus/Stomach	out group
ACH-000558	-2.08259	1	A172	Diffuse Glioma	CNS/Brain	out group
ACH-000593	-2.64217	1	BC3C	Bladder Urothelial Carcinoma	Bladder/Urinary Tract	in group	NO
ACH-000553	-4.43514	1	SQ1	Non-Small Cell Lung Cancer	Lung	out group
ACH-000552	-2.61098	1	HT29	Colorectal Adenocarcinoma	Bowel	out group
ACH-000549	-3.70558	1	SNU1076	Head and Neck Squamous Cell Carcinoma	Head and Neck	out group
ACH-000548	-1.10102	1	BHY	Head and Neck Squamous Cell Carcinoma	Head and Neck	out group
ACH-000011	-2.47028	1	253J	Bladder Urothelial Carcinoma	Bladder/Urinary Tract	in group	NO
ACH-000473	-2.42692	1	RT112	Bladder Urothelial Carcinoma	Bladder/Urinary Tract	in group	NO
ACH-000544	-3.90937	1	OE21	Esophageal Squamous Cell Carcinoma	Esophagus/Stomach	out group
ACH-000543	-0.928659	1	SNU489	Diffuse Glioma	CNS/Brain	out group
ACH-000542	-0.470649	1	HEYA8	Ovarian Epithelial Tumor	Ovary/Fallopian Tube	out group
ACH-000537	-1.89364	1	SNU761	Hepatocellular Carcinoma	Liver	out group
ACH-000535	-1.37407	1	BXPC3	Pancreatic Adenocarcinoma	Pancreas	out group
ACH-000250	-2.24986	1	KMRC20	Renal Cell Carcinoma	Kidney	out group
ACH-000532	-2.17916	1	SNU61	Colorectal Adenocarcinoma	Bowel	out group
ACH-000530	-1.48304	1	DMS114	Lung Neuroendocrine Tumor	Lung	out group
ACH-000528	-1.216	1	ABC1	Non-Small Cell Lung Cancer	Lung	out group
ACH-000527	-2.73771	1	OVISE	Ovarian Epithelial Tumor	Ovary/Fallopian Tube	out group
ACH-000524	-0.738661	1	KURAMOCHI	Ovarian Epithelial Tumor	Ovary/Fallopian Tube	out group
ACH-000521	-2.26917	1	NCIH2030	Non-Small Cell Lung Cancer	Lung	out group
ACH-000518	-2.99034	1	CAL33	Head and Neck Squamous Cell Carcinoma	Head and Neck	out group
ACH-000517	-1.17745	1	SNU410	Pancreatic Adenocarcinoma	Pancreas	out group
ACH-000516	-0.00444345	1	CAL78	Chondrosarcoma	Bone	out group
ACH-000510	-2.45838	1	NCIH1299	Non-Small Cell Lung Cancer	Lung	out group
ACH-000507	-2.40597	1	KE39	Esophagogastric Adenocarcinoma	Esophagus/Stomach	out group
ACH-000505	-1.76027	1	RKN	Leiomyosarcoma	Soft Tissue	out group
ACH-000504	-2.08675	1	SNB75	Diffuse Glioma	CNS/Brain	out group
ACH-000503	-1.53832	1	BICR16	Head and Neck Squamous Cell Carcinoma	Head and Neck	out group
ACH-000502	-1.90815	1	TCCPAN2	Pancreatic Adenocarcinoma	Pancreas	out group
ACH-000500	-3.37557	1	SNU46	Head and Neck Squamous Cell Carcinoma	Head and Neck	out group
ACH-000499	-2.83736	1	EW8	Ewing Sarcoma	Bone	out group
ACH-000496	-3.19294	1	NCIH1792	Non-Small Cell Lung Cancer	Lung	out group
ACH-000547	-2.22889	1	HT1197	Bladder Urothelial Carcinoma	Bladder/Urinary Tract	in group	NO
ACH-000493	-4.8802	1	SNU423	Hepatocellular Carcinoma	Liver	out group
ACH-000489	-1.4118	1	SW1116	Colorectal Adenocarcinoma	Bowel	out group
ACH-000488	-3.566	1	TE11	Esophageal Squamous Cell Carcinoma	Esophagus/Stomach	out group
ACH-000720	-2.19989	1	TCCSUP	Bladder Urothelial Carcinoma	Bladder/Urinary Tract	in group	YES
ACH-000485	0.0297031	1	GSU	Esophagogastric Adenocarcinoma	Esophagus/Stomach	out group
ACH-000649	-2.0162	1	786O	Renal Cell Carcinoma	Kidney	out group
ACH-000483	-2.02486	1	SNU182	Hepatocellular Carcinoma	Liver	out group
ACH-000482	-1.07634	1	RERFLCKJ	Non-Small Cell Lung Cancer	Lung	out group
ACH-000481	-2.12828	1	NCIH2170	Non-Small Cell Lung Cancer	Lung	out group
ACH-000479	-2.76846	1	KNS81	Diffuse Glioma	CNS/Brain	out group
ACH-000477	-1.10693	1	MALME3M	Melanoma	Skin	out group
ACH-000476	-2.12103	1	JHH4	Hepatocellular Carcinoma	Liver	out group
ACH-000475	-1.04793	1	HUH1	Hepatocellular Carcinoma	Liver	out group
ACH-000741	-1.9772	1	UBLC1	Bladder Urothelial Carcinoma	Bladder/Urinary Tract	in group	YES
ACH-000472	-0.593518	1	HSC2	Head and Neck Squamous Cell Carcinoma	Head and Neck	out group
ACH-000471	-1.30338	1	LI7	Hepatocellular Carcinoma	Liver	out group
ACH-000470	-1.18131	1	SW1463	Colorectal Adenocarcinoma	Bowel	out group
ACH-000469	-4.1287	1	YH13	Diffuse Glioma	CNS/Brain	out group
ACH-000468	-2.41561	1	PK45H	Pancreatic Adenocarcinoma	Pancreas	out group
ACH-000467	-4.04224	1	HCC56	Colorectal Adenocarcinoma	Bowel	out group
ACH-000466	-0.378091	1	SNU216	Esophagogastric Adenocarcinoma	Esophagus/Stomach	out group
ACH-000464	-2.23004	1	CAS1	Diffuse Glioma	CNS/Brain	out group
ACH-000463	-4.20124	1	NCIH460	Non-Small Cell Lung Cancer	Lung	out group
ACH-000461	-1.5092	1	SNU1196	Intraductal Papillary Neoplasm of the Bile Duct	Biliary Tract	out group
ACH-000458	-4.12708	1	CJM	Melanoma	Skin	out group
ACH-000495	-1.74176	1	TUHR4TKB	Renal Cell Carcinoma	Kidney	out group
ACH-000456	-5.33651	1	BCPAP	Poorly Differentiated Thyroid Cancer	Thyroid	out group
ACH-000454	-3.49361	1	HCC95	Non-Small Cell Lung Cancer	Lung	out group
ACH-000452	0.0871707	1	TE8	Esophageal Squamous Cell Carcinoma	Esophagus/Stomach	out group
ACH-000450	-1.82283	1	MELHO	Melanoma	Skin	out group
ACH-000449	-4.09724	1	MESSA	Uterine Sarcoma/Mesenchymal	Uterus	out group
ACH-000447	-1.7633	1	NCIH2228	Non-Small Cell Lung Cancer	Lung	out group
ACH-000445	-3.21651	1	KNS60	Diffuse Glioma	CNS/Brain	out group
ACH-000444	-1.11088	1	LU99	Non-Small Cell Lung Cancer	Lung	out group
ACH-000443	-0.0857804	1	OVKATE	Ovarian Epithelial Tumor	Ovary/Fallopian Tube	out group
ACH-000441	-0.55674	1	SH4	Melanoma	Skin	out group
ACH-000437	-3.33651	1	SW1088	Diffuse Glioma	CNS/Brain	out group
ACH-000435	-3.90651	1	EFE184	Endometrial Carcinoma	Uterus	out group
ACH-000434	-1.94603	1	NCIH1915	Non-Small Cell Lung Cancer	Lung	out group
ACH-000242	-1.65688	1	RT4	Bladder Urothelial Carcinoma	Bladder/Urinary Tract	in group	NO
ACH-000430	-2.53864	1	TYKNU	Ovarian Epithelial Tumor	Ovary/Fallopian Tube	out group
ACH-000384	-1.58948	1	SW780	Bladder Urothelial Carcinoma	Bladder/Urinary Tract	in group	NO
ACH-000724	-1.50237	1	HT1376	Bladder Urothelial Carcinoma	Bladder/Urinary Tract	in group	YES
ACH-000425	-3.50861	1	UACC62	Melanoma	Skin	out group
ACH-000423	-1.61063	1	SKMEL3	Melanoma	Skin	out group
ACH-000421	-2.21419	1	SW837	Colorectal Adenocarcinoma	Bowel	out group
ACH-000420	-2.16594	1	SNU449	Hepatocellular Carcinoma	Liver	out group
ACH-000418	-3.26281	1	SW1353	Chondrosarcoma	Bone	out group
ACH-000417	-2.78779	1	PANC0813	Pancreatic Adenocarcinoma	Pancreas	out group
ACH-000416	-4.83524	1	NCIH838	Non-Small Cell Lung Cancer	Lung	out group
ACH-000415	-0.905254	1	BICR6	Head and Neck Squamous Cell Carcinoma	Head and Neck	out group
ACH-000414	-4.65495	1	NCIH1944	Non-Small Cell Lung Cancer	Lung	out group
ACH-000753	-1.4784	1	JMSU1	Bladder Urothelial Carcinoma	Bladder/Urinary Tract	in group	NO
ACH-000408	-2.26553	1	TE5	Esophageal Squamous Cell Carcinoma	Esophagus/Stomach	out group
ACH-000407	-2.88088	1	SNU685	Endometrial Carcinoma	Uterus	out group
ACH-000404	-0.937814	1	K029AX	Melanoma	Skin	out group
ACH-000403	-3.1832	1	NCIH747	Colorectal Adenocarcinoma	Bowel	out group
ACH-000401	-3.65175	1	COLO800	Melanoma	Skin	out group
ACH-000400	-1.2672	1	SKCO1	Colorectal Adenocarcinoma	Bowel	out group
ACH-000399	0.337031	1	NCIH2196	Lung Neuroendocrine Tumor	Lung	out group
ACH-000397	-1.83333	1	TEN	Endometrial Carcinoma	Uterus	out group
ACH-000545	-1.34503	1	VMCUB1	Bladder Urothelial Carcinoma	Bladder/Urinary Tract	in group	YES
ACH-000395	-1.79121	1	NCIH520	Non-Small Cell Lung Cancer	Lung	out group
ACH-000393	-1.34799	1	HLF	Hepatocellular Carcinoma	Liver	out group
ACH-000391	-3.42742	1	MHHES1	Ewing Sarcoma	Bone	out group
ACH-000390	-1.61409	1	LUDLU1	Non-Small Cell Lung Cancer	Lung	out group
ACH-000389	-2.01588	1	H4	Diffuse Glioma	CNS/Brain	out group
ACH-000684	-1.27992	1	KMRC1	Renal Cell Carcinoma	Kidney	out group
ACH-000383	-0.644142	1	OE33	Esophagogastric Adenocarcinoma	Esophagus/Stomach	out group
ACH-000378	-1.46315	1	NCIH647	Non-Small Cell Lung Cancer	Lung	out group
ACH-000376	-0.133343	1	SF295	Diffuse Glioma	CNS/Brain	out group
ACH-000313	-1.25965	1	KMRC3	Renal Cell Carcinoma	Kidney	out group
ACH-000374	-2.84803	1	HCC1143	Invasive Breast Carcinoma	Breast	out group
ACH-000368	-2.8349	1	SNU1105	Diffuse Glioma	CNS/Brain	out group
ACH-000367	-2.0638	1	NCIH226	Pleural Mesothelioma	Pleura	out group
ACH-000366	-1.01504	1	SKNDZ	Neuroblastoma	Peripheral Nervous System	out group
ACH-000364	-2.31695	1	U2OS	Osteosarcoma	Bone	out group
ACH-000361	-3.1256	1	SKHEP1	Hepatocellular Carcinoma	Liver	out group
ACH-000359	-1.81429	1	MG63	Osteosarcoma	Bone	out group
ACH-000356	-2.87605	1	MKN45	Esophagogastric Adenocarcinoma	Esophagus/Stomach	out group
ACH-000352	-0.992236	1	HCC1428	Invasive Breast Carcinoma	Breast	out group
ACH-000351	-4.01709	1	MKN1	Esophagogastric Adenocarcinoma	Esophagus/Stomach	out group
ACH-000350	-0.598691	1	COLO678	Colorectal Adenocarcinoma	Bowel	out group
ACH-000348	-2.1268	1	RPMI7951	Melanoma	Skin	out group
ACH-000347	0.10031	1	QGP1	Pancreatic Neuroendocrine Tumor	Pancreas	out group
ACH-000344	-1.13589	1	SNU668	Esophagogastric Adenocarcinoma	Esophagus/Stomach	out group
ACH-000343	-1.62221	1	NCIH522	Non-Small Cell Lung Cancer	Lung	out group
ACH-000341	-0.417419	1	SKNFI	Neuroblastoma	Peripheral Nervous System	out group
ACH-000335	-3.06241	1	MSTO211H	Pleural Mesothelioma	Pleura	out group
ACH-000332	0.182889	1	YAPC	Pancreatic Adenocarcinoma	Pancreas	out group
ACH-000331	-0.532363	1	ISTMES2	Pleural Mesothelioma	Pleura	out group
ACH-000330	-1.40868	1	EFM19	Invasive Breast Carcinoma	Breast	out group
ACH-000329	-1.28071	1	CCFSTTG1	Diffuse Glioma	CNS/Brain	out group
ACH-000324	-1.7583	1	JHOC5	Ovarian Epithelial Tumor	Ovary/Fallopian Tube	out group
ACH-000323	-2.07202	1	42MGBA	Diffuse Glioma	CNS/Brain	out group
ACH-000322	-0.947059	1	HT144	Melanoma	Skin	out group
ACH-000320	-3.47139	1	PSN1	Pancreatic Adenocarcinoma	Pancreas	out group
ACH-000319	-0.153742	1	MPP89	Pleural Mesothelioma	Pleura	out group
ACH-000318	-4.15816	1	TE10	Esophageal Squamous Cell Carcinoma	Esophagus/Stomach	out group
ACH-000316	-5.004	1	SNU886	Hepatocellular Carcinoma	Liver	out group
ACH-001210	-1.17764	1	TTC1240	Rhabdoid Cancer	Kidney	out group
ACH-000312	-1.78284	1	SKNBE2	Neuroblastoma	Peripheral Nervous System	out group
ACH-000311	-3.94545	1	NCIH2122	Non-Small Cell Lung Cancer	Lung	out group
ACH-000309	-0.385408	1	SKLU1	Non-Small Cell Lung Cancer	Lung	out group
ACH-000308	-4.2019	1	EFO21	Ovarian Epithelial Tumor	Ovary/Fallopian Tube	out group
ACH-000307	-3.61835	1	PK1	Pancreatic Adenocarcinoma	Pancreas	out group
ACH-000305	-0.627269	1	ECGI10	Esophageal Squamous Cell Carcinoma	Esophagus/Stomach	out group
ACH-000302	0.0397996	1	SNU1077	Endometrial Carcinoma	Uterus	out group
ACH-000296	-1.74475	1	OUMS23	Colorectal Adenocarcinoma	Bowel	out group
ACH-000292	-3.89011	1	NCIH841	Lung Neuroendocrine Tumor	Lung	out group
ACH-000291	0.406722	1	OV90	Ovarian Epithelial Tumor	Ovary/Fallopian Tube	out group
ACH-000289	-1.48074	1	SNU466	Diffuse Glioma	CNS/Brain	out group
ACH-000288	-2.2546	1	BT549	Invasive Breast Carcinoma	Breast	out group
ACH-000281	-1.27842	1	KP2	Pancreatic Adenocarcinoma	Pancreas	out group
ACH-000280	-2.46527	1	SNU840	Ovarian Epithelial Tumor	Ovary/Fallopian Tube	out group
ACH-000279	-3.20758	1	EWS502	Ewing Sarcoma	Bone	out group
ACH-000278	-3.0753	1	COV362	Ovarian Epithelial Tumor	Ovary/Fallopian Tube	out group
ACH-000277	-0.030976	1	HCC1419	Invasive Breast Carcinoma	Breast	out group
ACH-000276	-0.47164	1	HCC38	Invasive Breast Carcinoma	Breast	out group
ACH-000274	-1.24952	1	HS852T	Melanoma	Skin	out group
ACH-000273	-3.23697	1	SF539	Diffuse Glioma	CNS/Brain	out group
ACH-000270	0.993274	1	HPAC	Pancreatic Adenocarcinoma	Pancreas	out group
ACH-000268	-0.0232695	1	SNU245	Intraductal Papillary Neoplasm of the Bile Duct	Biliary Tract	out group
ACH-000266	0.26333	1	SNU213	Pancreatic Adenocarcinoma	Pancreas	out group
ACH-000265	-1.17782	1	KP4	Pancreatic Adenocarcinoma	Pancreas	out group
ACH-000264	-5.87669	1	CALU6	Non-Small Cell Lung Cancer	Lung	out group
ACH-000261	-4.34124	1	RERFLCAI	Non-Small Cell Lung Cancer	Lung	out group
ACH-000260	-1.42163	1	SKNAS	Neuroblastoma	Peripheral Nervous System	out group
ACH-000259	-3.06078	1	KELLY	Neuroblastoma	Peripheral Nervous System	out group
ACH-000256	0.550747	1	COV318	Ovarian Epithelial Tumor	Ovary/Fallopian Tube	out group
ACH-000255	-3.86674	1	LMSU	Esophagogastric Adenocarcinoma	Esophagus/Stomach	out group
ACH-000252	-2.52949	1	LS1034	Colorectal Adenocarcinoma	Bowel	out group
ACH-000484	-1.14802	1	VMRCRCW	Renal Cell Carcinoma	Kidney	out group
ACH-000249	-1.36057	1	CL11	Colorectal Adenocarcinoma	Bowel	out group
ACH-000244	-1.21647	1	DKMG	Diffuse Glioma	CNS/Brain	out group
ACH-000243	-4.54813	1	DANG	Pancreatic Adenocarcinoma	Pancreas	out group
ACH-000026	-1.1167	1	253JBV	Bladder Urothelial Carcinoma	Bladder/Urinary Tract	in group	NO
ACH-000237	-3.2891	1	JHOM1	Ovarian Epithelial Tumor	Ovary/Fallopian Tube	out group
ACH-000235	-4.06778	1	PANC0403	Pancreatic Adenocarcinoma	Pancreas	out group
ACH-000792	-0.971906	1	BFTC909	Renal Cell Carcinoma	Kidney	out group
ACH-000232	-2.82827	1	U251MG	Diffuse Glioma	CNS/Brain	out group
ACH-000231	-2.77592	1	KALS1	Diffuse Glioma	CNS/Brain	out group
ACH-000228	-3.76873	1	BICR31	Head and Neck Squamous Cell Carcinoma	Head and Neck	out group
ACH-000227	-0.823074	1	KPNYN	Neuroblastoma	Peripheral Nervous System	out group
ACH-000223	-1.31646	1	HCC1937	Invasive Breast Carcinoma	Breast	out group
ACH-000222	-3.01113	1	ASPC1	Pancreatic Adenocarcinoma	Pancreas	out group
ACH-000221	-1.15591	1	SNU398	Hepatocellular Carcinoma	Liver	out group
ACH-000219	-2.64917	1	A375	Melanoma	Skin	out group
ACH-000217	-0.373251	1	JHH6	Hepatocellular Carcinoma	Liver	out group
ACH-000213	-2.53892	1	HUPT4	Pancreatic Adenocarcinoma	Pancreas	out group
ACH-000212	-0.906878	1	CAL120	Invasive Breast Carcinoma	Breast	out group
ACH-000211	-4.1364	1	DAOY	Embryonal Tumor	CNS/Brain	out group
ACH-000210	-1.42504	1	CADOES1	Ewing Sarcoma	Bone	out group
ACH-000209	-1.37945	1	SNU1079	Intraductal Papillary Neoplasm of the Bile Duct	Biliary Tract	out group
ACH-000207	-4.5102	1	DETROIT562	Head and Neck Squamous Cell Carcinoma	Head and Neck	out group
ACH-000205	-2.27982	1	PK59	Pancreatic Adenocarcinoma	Pancreas	out group
ACH-000201	-0.89177	1	A204	Rhabdomyosarcoma	Soft Tissue	out group
ACH-000200	-2.2211	1	NMCG1	Diffuse Glioma	CNS/Brain	out group
ACH-000192	-1.38806	1	MFE280	Endometrial Carcinoma	Uterus	out group
ACH-000191	-2.59328	1	BHT101	Anaplastic Thyroid Cancer	Thyroid	out group
ACH-000533	-0.842482	1	NCIH2004RT	Rhabdoid Cancer	Kidney	out group
ACH-000188	-4.09482	1	SCC25	Head and Neck Squamous Cell Carcinoma	Head and Neck	out group
ACH-000186	-1.70422	1	NCIH2444	Non-Small Cell Lung Cancer	Lung	out group
ACH-000182	-1.9148	1	SNU869	Ampullary Carcinoma	Ampulla of Vater	out group
ACH-000178	-0.89149	1	HS766T	Pancreatic Adenocarcinoma	Pancreas	out group
ACH-000176	-1.49893	1	LOUNH91	Non-Small Cell Lung Cancer	Lung	out group
ACH-000174	-2.85166	1	CAL62	Anaplastic Thyroid Cancer	Thyroid	out group
ACH-000172	-2.37506	1	TM87	Embryonal Tumor	CNS/Brain	out group
ACH-000802	-0.838029	1	BFTC905	Bladder Urothelial Carcinoma	Bladder/Urinary Tract	in group	NO
ACH-000169	-2.00137	1	RD	Rhabdomyosarcoma	Soft Tissue	out group
ACH-000164	-0.826209	1	PANC1	Pancreatic Adenocarcinoma	Pancreas	out group
ACH-000163	-2.61841	1	SW579	Head and Neck Squamous Cell Carcinoma	Head and Neck	out group
ACH-000161	-0.440748	1	CORL105	Non-Small Cell Lung Cancer	Lung	out group
ACH-000428	-0.381408	1	UO31	Renal Cell Carcinoma	Kidney	out group
ACH-000155	-1.03472	1	SW1990	Pancreatic Adenocarcinoma	Pancreas	out group
ACH-000153	-2.18942	1	NCIH2052	Pleural Mesothelioma	Pleura	out group
ACH-000147	-1.56149	1	T47D	Invasive Breast Carcinoma	Breast	out group
ACH-000457	0.177025	1	CAL54	Renal Cell Carcinoma	Kidney	out group
ACH-000141	-1.10877	1	SNU308	Intracholecystic Papillary Neoplasm	Biliary Tract	out group
ACH-000138	-2.61005	1	CFPAC1	Pancreatic Adenocarcinoma	Pancreas	out group
ACH-000137	-2.65313	1	8MGBA	Diffuse Glioma	CNS/Brain	out group
ACH-000133	-3.08263	1	HS729	Rhabdomyosarcoma	Soft Tissue	out group
ACH-000132	-1.1598	1	JHOS2	Ovarian Epithelial Tumor	Ovary/Fallopian Tube	out group
ACH-000123	-1.64774	1	COV434	Ovarian Epithelial Tumor	Ovary/Fallopian Tube	out group
ACH-000118	-2.30737	1	HUPT3	Pancreatic Adenocarcinoma	Pancreas	out group
ACH-000117	-0.74884	1	EFM192A	Invasive Breast Carcinoma	Breast	out group
ACH-000116	-3.22932	1	OAW28	Ovarian Epithelial Tumor	Ovary/Fallopian Tube	out group
ACH-000114	-0.134567	1	SU8686	Pancreatic Adenocarcinoma	Pancreas	out group
ACH-000108	-2.85136	1	KP3	Adenosquamous Carcinoma of the Pancreas	Pancreas	out group
ACH-000107	-1.28944	1	CAPAN2	Pancreatic Adenocarcinoma	Pancreas	out group
ACH-000102	-0.711684	1	GMS10	Diffuse Glioma	CNS/Brain	out group
ACH-000099	-0.105244	1	SIMA	Neuroblastoma	Peripheral Nervous System	out group
ACH-000098	-3.76623	1	GAMG	Diffuse Glioma	CNS/Brain	out group
ACH-000097	-1.90788	1	ZR751	Invasive Breast Carcinoma	Breast	out group
ACH-001200	0.39787	1	STM9101	Rhabdoid Cancer	Kidney	out group
ACH-000092	-3.12129	1	NCIH2452	Pleural Mesothelioma	Pleura	out group
ACH-000091	-3.32653	1	OV56	Ovarian Epithelial Tumor	Ovary/Fallopian Tube	out group
ACH-000090	-2.19053	1	PC3	Prostate Adenocarcinoma	Prostate	out group
ACH-000087	-3.05684	1	SKES1	Ewing Sarcoma	Bone	out group
ACH-000086	0.183818	1	ACCMESO1	Pleural Mesothelioma	Pleura	out group
ACH-000085	-0.674127	1	T3M4	Pancreatic Adenocarcinoma	Pancreas	out group
ACH-000082	-0.474075	1	G292CLONEA141B1	Osteosarcoma	Bone	out group
ACH-000078	-0.130396	1	MHHNB11	Neuroblastoma	Peripheral Nervous System	out group
ACH-000075	-2.85007	1	U87MG	Diffuse Glioma	CNS/Brain	out group
ACH-000066	-2.09519	1	HCC4006	Non-Small Cell Lung Cancer	Lung	out group
ACH-000062	-2.58198	1	RERFLCMS	Non-Small Cell Lung Cancer	Lung	out group
ACH-000060	-3.70669	1	PANC1005	Pancreatic Adenocarcinoma	Pancreas	out group
ACH-000054	-3.40595	1	HT1080	Fibrosarcoma	Soft Tissue	out group
ACH-000052	-2.26035	1	A673	Ewing Sarcoma	Bone	out group
ACH-000048	-2.44678	1	TOV112D	Ovarian Epithelial Tumor	Ovary/Fallopian Tube	out group
ACH-000047	-3.53195	1	GCIY	Esophagogastric Adenocarcinoma	Esophagus/Stomach	out group
ACH-000429	0.459773	1	A704	Renal Cell Carcinoma	Kidney	out group
ACH-000042	-2.44355	1	PANC0203	Pancreatic Adenocarcinoma	Pancreas	out group
ACH-000041	-1.06692	1	RDES	Ewing Sarcoma	Bone	out group
ACH-000040	-0.321547	1	U118MG	Diffuse Glioma	CNS/Brain	out group
ACH-000037	-0.888962	1	S117	Sarcoma, NOS	Soft Tissue	out group
ACH-000035	-3.19403	1	NCIH1650	Non-Small Cell Lung Cancer	Lung	out group
ACH-000030	-2.88487	1	PC14	Non-Small Cell Lung Cancer	Lung	out group
ACH-000027	-2.98518	1	GOS3	Diffuse Glioma	CNS/Brain	out group
ACH-000433	0.462324	1	CAKI1	Renal Cell Carcinoma	Kidney	out group
ACH-000023	-2.6	1	PATU8988T	Pancreatic Adenocarcinoma	Pancreas	out group
ACH-000022	-0.496438	1	PATU8988S	Pancreatic Adenocarcinoma	Pancreas	out group
ACH-000021	-3.89063	1	NCIH1693	Non-Small Cell Lung Cancer	Lung	out group
ACH-000019	-3.15814	1	MCF7	Invasive Breast Carcinoma	Breast	out group
ACH-000555	0.497801	1	A498	Renal Cell Carcinoma	Kidney	out group
ACH-000015	-3.87678	1	NCIH1581	Non-Small Cell Lung Cancer	Lung	out group
ACH-000014	-3.55915	1	HS294T	Melanoma	Skin	out group
ACH-000013	-1.3184	1	ONCODG1	Ovarian Epithelial Tumor	Ovary/Fallopian Tube	out group
ACH-000012	-1.00477	1	HCC827	Non-Small Cell Lung Cancer	Lung	out group
ACH-000159	0.654104	1	OSRC2	Renal Cell Carcinoma	Kidney	out group
ACH-000008	-0.901625	1	A101D	Melanoma	Skin	out group
ACH-000007	-4.36866	1	LS513	Colorectal Adenocarcinoma	Bowel	out group
ACH-000001	-0.137174	1	NIHOVCAR3	Ovarian Epithelial Tumor	Ovary/Fallopian Tube	out group
